1  
2  
3  
4  
5  
6  
7  
8  
9  
10  
11  
12  
13  
14  
15  
16  
17  
18  
19  
20  
21  
22  
23  
24  
25  
26  
27  
28  
29

## **Temporal patterning of the central nervous system by a shared transcription factor code**

Andreas Sagner<sup>1,2,\*</sup>, Isabel Zhang<sup>1</sup>, Thomas Watson<sup>1</sup>, Jorge Lazaro<sup>1,3</sup>,  
Manuela Melchionda<sup>1</sup> and James Briscoe<sup>1,\*</sup>

[1] The Francis Crick Institute, 1 Midland Road, London, NW1 1AT, UK

[2] Faculty of Biology, Medicine and Health, The University of Manchester, Oxford  
Road, Manchester, M13 9PL, UK

[3] present address: European Molecular Biology Laboratory (EMBL) Barcelona, Dr.  
Aiguader 88, 08003 Barcelona, Spain

[\*] Correspondence to either Andreas Sagner ([andreas.sagner@manchester.ac.uk](mailto:andreas.sagner@manchester.ac.uk))  
or James Briscoe ([james.briscoe@crick.ac.uk](mailto:james.briscoe@crick.ac.uk))

### **Abstract**

The molecular mechanisms that ensure the reproducible generation of neuronal diversity in the vertebrate nervous system are incompletely understood. Here we provide evidence of a temporal patterning program consisting of cohorts of transcription factors expressed in neurons generated at successive developmental timepoints. This program acts in parallel to spatial patterning, diversifying neurons throughout the nervous system and in neurons differentiated in-vitro from stem cells. We demonstrate the TGF $\beta$  signalling pathway controls the pace of the temporal program. Furthermore, targeted perturbation of components of the temporal program, *Nfia* and *Nfib*, reveals their requirement for the generation of late-born neuronal subtypes. Together, our results provide evidence for the existence of a previously unappreciated global temporal program of neuronal subtype identity and suggest that the integration of spatial and temporal patterning programs diversifies and organises neuronal subtypes in the vertebrate nervous system.

## 30 Introduction

31 In mammals, the function of the nervous system depends on hundreds of molecularly and  
32 functionally distinct cell types (Zeng and Sanes, 2017). This diversity requires the generation  
33 of different neuronal subtypes at the right place, time and quantity during development, which  
34 in turn, guides the wiring of functioning neural circuits. The molecular mechanisms that direct  
35 the specification of distinct neuronal classes at characteristic positions, by subdividing the  
36 developing nervous system into topographical territories, have received considerable attention  
37 (Jessell, 2000; Philippidou and Dasen, 2013). However, even within the same region of the  
38 nervous system, most neuronal classes can be further partitioned into distinct subtypes based  
39 on molecular and functional properties (Bikoff et al., 2016; Gabitto et al., 2016; Häring et al.,  
40 2018; Manno et al., 2020; Sathyamurthy et al., 2018; Zeisel et al., 2018), suggesting that  
41 spatial patterning programs are not sufficient to account for the diversity of neuronal subtypes  
42 observed in the nervous system.

43 Temporal mechanisms – the sequential production of different cell types at the same  
44 location – have been proposed to contribute to the generation of cell type diversity (Holguera  
45 and Desplan, 2018; Kohwi and Doe, 2013). In the *Drosophila* nervous system, individual  
46 neuroblasts produce a characteristic temporal series of distinct neuronal subtypes (Doe,  
47 2017). Similar mechanisms have been documented in some regions of the vertebrate nervous  
48 system (Cepko, 2014; Holguera and Desplan, 2018; Oberst et al., 2019). For example, in the  
49 cortex distinct subtypes of glutamatergic neurons are sequentially generated (Jabaudon, 2017;  
50 Telley et al., 2019), in the hindbrain first motor neurons (MNs) and later serotonergic neurons  
51 are generated from the same set of progenitors (Pattyn et al., 2003), while in the midbrain, the  
52 production of ocular MNs is followed by red nucleus neurons (Deng et al., 2011). Moreover,  
53 progenitors throughout the nervous system typically produce neurons first and later generate  
54 glial cells such as astrocytes and oligodendrocytes (Miller and Gauthier, 2007; Rowitch and  
55 Kriegstein, 2010). However, whether temporal programs are a universal feature of neuronal  
56 subtype specification in the vertebrate nervous system and whether these are implemented by  
57 common or location specific mechanisms is unclear.

58 The vertebrate spinal cord is an experimentally tractable system to address the basis  
59 of neuronal diversity. In this region of the nervous system, neurons process sensory inputs  
60 from the periphery relaying the information to the brain or to motor circuits that control and  
61 coordinate muscle activity. The temporally stratified generation of some of these neuronal  
62 subtypes has been documented, including inhibitory and excitatory neurons located in the  
63 dorsal horn as well as ventral motor and interneurons (Benito-Gonzalez and Alvarez, 2012;  
64 Deska-Gauthier et al., 2020; Hayashi et al., 2018; Hollyday and Hamburger, 1977; Luxenhofer

65 et al., 2014; Müller et al., 2002; Sockanathan and Jessell, 1998; Stam et al., 2012).  
66 Furthermore, the birth order of neurons seems to control the specificity of neuronal  
67 connectivity, with flexor and extensor muscle premotor interneurons born at different  
68 timepoints during development (Tripodi et al., 2011). Nevertheless, a comprehensive picture  
69 is lacking and the genetic programs that orchestrate the temporal patterning of the spinal cord  
70 are largely unclear. To this end, we recently characterized the emergence of neuronal diversity  
71 in the embryonic spinal cord (Delile et al., 2019). This revealed cohorts of transcription factors  
72 (TFs) that further partition all major neuronal subtypes. Moreover, the onset of expression of  
73 these different cohorts occurs at characteristic timepoints during the neurogenic period of  
74 spinal cord development (Figure 1A). In all domains, the earliest neurons express Onecut-  
75 family TFs, intermediate neurons express Pou2f2 and Zfhx2-4, while late-born neurons  
76 express Nfia/b/x and Neurod2/6 (Delile et al., 2019; Sagner and Briscoe, 2019). This suggests  
77 the existence of a previously unappreciated temporal dimension to neuronal subtype  
78 generation in the spinal cord.

79         Although the role of these TFs had not been conceptualized as part of a globally  
80 coordinated temporal code, some have been shown to specify subpopulations of neurons in  
81 individual domains in the spinal cord. Onecut TFs, for example, are required in early-born V1  
82 and MNs for the specification of Renshaw cells and medial lateral motor column (LMCm)  
83 neurons respectively (Roy et al., 2012; Stam et al., 2012). Furthermore, Onecut TFs and  
84 Pou2f2 control the distribution of neurons from multiple dorsal-ventral domains (Harris et al.,  
85 2019; Kabayiza et al., 2017; Masgutova et al., 2019). Neurod2/6 control neuropeptide  
86 expression in inhibitory neurons in the dorsal horns of the spinal cord (Bröhl et al., 2008) and  
87 characterization of V2a neuron heterogeneity revealed that Zfhx3 and Neurod2/Nfib divide this  
88 neuronal class into a lateral and medial population (Hayashi et al., 2018). Similar to the spinal  
89 cord, Onecut, Pou2f2 and Nfi-TFs label early and late born neuronal subtypes in the retina  
90 and are required for their generation (Clark et al., 2019; Javed et al., 2020; Sapkota et al.,  
91 2014) and Pou2f2, Zfhx3 and Nfi TFs define distinct subpopulations of Pitx3-positive neurons  
92 born from the midbrain floor plate including dopaminergic neurons (Tiklová et al., 2019). These  
93 observations raise the possibility that this temporal TF code is conserved in large parts of the  
94 central nervous system.

95         TGF $\beta$  signalling has been implicated in the timing of developmental temporal switches  
96 in the nervous system (Dias et al., 2014; Rossi and Desplan, 2020). The transition from MN  
97 to serotonergic neurons and from ocular MNs to red nucleus neurons is accelerated by TGF $\beta$   
98 signalling (Dias et al., 2014). TGF $\beta$  signalling also promotes the expression of the late  
99 progenitor marker Nfia in neurogenic neural stem cells (Tchieu et al., 2019). Furthermore,

100 Growth differentiation factor 11 (Gdf11), a ligand of the TGF $\beta$  family that signals via Activin  
101 receptors (Andersson et al., 2006; Paul Oh et al., 2002), has been implicated in the timing of  
102 MN subtype generation and onset of gliogenesis in the spinal cord (Shi and Liu, 2011). TGF $\beta$   
103 signalling is also important for controlling the timing of fate switches in the *Drosophila* nervous  
104 system (Rossi and Desplan, 2020), raising the possibility that it may serve as a general timer  
105 for the sequential generation of cellular subtypes.

106 Here, we demonstrate by EdU-birthdating that a set of TFs comprise a temporal TF  
107 code that identifies neurons based on their timepoint of birth. We find that the same sequence  
108 of TF expression applies throughout the brain and for stem cell derived in-vitro generated  
109 neurons with defined dorsal-ventral and axial identities. We also document a temporal  
110 patterning code for progenitors throughout the nervous system and provide evidence that  
111 TGF $\beta$  signalling controls the pace of the temporal program. Finally, to characterize the genetic  
112 programs that control the temporal specification of neurons, we perturb the function of the TFs  
113 Nfia and Nfib and show that their activity is required for the generation of late neuronal  
114 subtypes. Taken together, our data reveal conserved temporal patterning of neurons and  
115 progenitors in large parts of the nervous system that is under the control of the TGF $\beta$  signalling  
116 pathway and suggest a close link between the developmental programs that control the switch  
117 from neuro- to gliogenesis and the specification of neuronal diversity.

## 118 Results

### 119 EdU-birthdating reveals a temporal TF code in spinal cord neurons

120 We previously identified cohorts of TFs that are expressed in multiple subsets of neurons in  
121 the spinal cord. As the onset of expression of these TFs occurred at different times during  
122 development, we speculated that they subdivide neurons in the spinal cord based on their  
123 timepoint of birth (Delile et al., 2019) (Figure 1A). We and others have demonstrated before  
124 that Onecut TFs are expressed in early-born neurons and that their expression is rapidly  
125 extinguished as neurons mature (Delile et al., 2019; Kabayiza et al., 2017; Luxenhofer et al.,  
126 2014; Roy et al., 2012; Stam et al., 2012). We therefore focused on the TFs Zfhx3, Nfib and  
127 Neurod2, which start to be expressed in neurons at intermediate or late stages during the  
128 neurogenic period respectively, and analysed the birth date of neurons expressing these TFs  
129 by EdU incorporation (Figure 1B). Pregnant dams were injected with EdU at embryonic day  
130 (e)9.5, e10.5, e11.5 or e12.5 (Figure 1C). Embryos were collected at e13.5 and forelimb-level  
131 spinal cord cryo-sections assayed for colocalization between EdU and Zfhx3, Nfib and  
132 Neurod2 in neurons (Figure 1D-F and Figure S1).

133 Consistent with the hypothesis of a temporal TF code, a high proportion of EdU-labelled  
134 neurons expressed Zfhx3, when EdU was administered at e9.5 and e10.5, while there was  
135 little if any colocalization between EdU and Zfhx3 when EdU was given at later timepoints  
136 (Figures 1G and S1A). By contrast, the proportion of EdU+ neurons expressing Nfib  
137 continually increased. Few EdU-positive neurons expressed Nfib when EdU was administered  
138 before e11.5, but more than 80% of EdU+ neurons were positive for Nfib when it was given at  
139 e12.5 (Figures 1G and S1B). Neurod2 followed a similar trend to Nfib until e11.5 (Figures 1G  
140 and S1C), consistent with the high degree of co-expression between these genes (Delile et  
141 al., 2019). However, the proportion of Neurod2-positive neurons decreased when EdU was  
142 given at e12.5 (Figures 1G and S1C). This may be due to the relatively late onset of Neurod2  
143 expression after neuronal differentiation. Furthermore, Neurod2 is not expressed in late-born  
144 dorsal excitatory neurons (Bröhl et al., 2008), which are generated at high frequency during  
145 late neurogenic stages in the spinal cord (Wildner et al., 2006).

146 The mutually exclusive birth dates of Zfhx3 and Nfib/Neurod2-positive neurons  
147 suggest that these TFs label largely non-overlapping subsets of neurons. To test this  
148 prediction directly, we stained e13.5 spinal cord sections for either Zfhx3 and Nfib or Zfhx3  
149 and Neurod2 (Figure S2). Although each of these markers labelled a large number of neurons,  
150 the expression of Zfhx3 and Nfib or Zfhx3 and Neurod2 was mutually exclusive. Taken  
151 together, the birth dates of neurons expressing different TFs closely matches our previous  
152 description of the onset of expression of these TFs from scRNAseq data (Delile et al., 2019).  
153 These results are consistent with a model in which Zfhx3 is specifically expressed and  
154 maintained in neurons born before e11.5 but not in later-born neurons, which instead express  
155 Neurod2/6 and Nfi-family TFs. These results further argue against sequential expression of  
156 these TFs during neuronal maturation because in such a model TFs with early onset of  
157 expression would be specific for early maturation stages and would thus, contrary to our  
158 observations, be expected to be labelled by EdU given at late developmental timepoints. We  
159 therefore conclude that these data provide clear evidence that these TFs comprise a temporal  
160 code and label distinct subsets of neurons based on their timepoint of birth in the spinal cord.

### 161 [Conservation of the temporal TF code in other regions of the nervous system](#)

162 Similar to the spinal cord, Pou2f2 and TFs of the Onecut and Nfi-families are required for the  
163 generation of early and late-born neurons in the retina (Clark et al., 2019; Javed et al., 2020;  
164 Sapkota et al., 2014). We therefore speculated that the temporal TF code is preserved in the  
165 retina. To test this hypothesis, we analysed a published scRNAseq time course of mouse  
166 retina development (Clark et al., 2019) (Figure S3). Performing dimensionality reduction by  
167 Uniform Manifold Approximation and Projection (UMAP) on the data from pre- and perinatal

168 stages (e14, e16, e18, P0) resulted in clear trajectories from retinal progenitors to horizontal  
169 cells, amacrine cells, retinal ganglion cells and cone and rod photoreceptors (Figure S3A,B).  
170 Examining *Onecut2*, *Pou2f2*, *Zfhx3* and *Nfib* revealed different expression of these genes  
171 along these differentiation trajectories (Figure S3C). As expected, *Onecut2* was strongly  
172 enriched in horizontal cells, an early born cell type in the retina, although some expression  
173 was also observed in retinal ganglion cells, amacrine cells, and cones. *Nfib* expression was  
174 largely restricted to late progenitors and rods (Figure S3C). By contrast, *Pou2f2* and *Zfhx3*  
175 were enriched in amacrine and retinal ganglion cells. Furthermore, both genes were  
176 expressed in subsets of retinal progenitors.

177 To further characterize the expression of *Onecut2*, *Pou2f2*, *Zfhx3* and *Nfib* genes in  
178 retinal neurons, we plotted their expression levels in the individual classes of neurons stratified  
179 by developmental stage (Figure S3D). This analysis revealed a clear link between the  
180 expression of these TFs and developmental stage. *Onecut2* was enriched in amacrine cells,  
181 retinal ganglion cells and cones at e14 (Figure S3D). *Zfhx3* was absent at this stage but was  
182 enriched in amacrine and retinal ganglion cells at e18 and P0 (Figure S3D). These data  
183 support the hypothesis that the temporal TFs are expressed in different retinal cell types born  
184 at distinct timepoints and raise the possibility that the expression of these genes further  
185 subdivide distinct classes of retinal neurons based on their birth dates.

186 *Nfi* TFs have been previously shown to be expressed in neurons in the forebrain  
187 including the cortex, thalamus and hippocampus (Piper et al., 2010; Plachez et al., 2008),  
188 while *Zfhx3* has been implicated in controlling circadian function of the suprachiasmatic  
189 nucleus (Parsons et al., 2015). Moreover, *Pou2f2*, *Zfhx3* and *Nfi* TFs are expressed in  
190 subpopulations of neurons born from the midbrain floorplate (Tiklová et al., 2019). These  
191 results raised the possibility that the sequential expression of the temporal TFs might be  
192 broadly preserved throughout the developing nervous system. To test this, we first turned our  
193 attention to available scRNAseq timecourse data from the developing forebrain, midbrain and  
194 hindbrain (Manno et al., 2020). Plotting the dynamics of *Onecut1-3*, *Pou2f2*, *Zfhx3/4*, *Nfia/b*  
195 and *Neurod2/6* in neurons between e8.5 and e14 revealed a striking conservation of the  
196 expression dynamics of these TFs. Expression of *Onecut*-family TFs preceded *Pou2f2* and  
197 *Zfhx3/4*, while *Nfia/b* and *Neurod2/6* were only expressed at high levels at later stages (Figure  
198 2A). To experimentally validate these predictions, we turned to immunofluorescent analysis of  
199 *Onecut2*, *Pou2f2*, *Zfhx3* and *Nfib* in hind- and midbrain cryo-sections from different  
200 developmental stages (Figure 2B-H). In both tissues, the majority of neurons expressed  
201 *Onecut2* but not *Pou2f2* at early developmental stages (e9.5 or e10.5 respectively) and both  
202 genes were expressed in largely non-overlapping populations of neurons one day later (Figure



203 2B,E,F). Furthermore, in both tissues a large proportion of neurons expressed *Zfhx3* at e11.5,  
204 while *Nfib* expression was confined to neural progenitors at this stage (Figure 2C,G,H). At  
205 e13.5 *Nfib*-positive cells, which had lost the expression of the progenitor marker *Sox2*, were  
206 detected in the mantle layer of both tissues where postmitotic neurons reside (Figure 2C,G,H).  
207 To test if these *Nfib*-expressing cells are neurons, we co-stained hindbrain sections for  
208 *Phox2b*, which is expressed in different populations of hindbrain neurons (Dubreuil et al.,  
209 2009). This analysis revealed colocalization between *Phox2b/Zfhx3* and *Phox2b/Nfib* in  
210 individual nuclei (Figure 2D), suggesting that *Nfib* indeed labels late-born neurons in the  
211 hindbrain. These results suggest the existence of a conserved temporal patterning program  
212 that subdivides neurons based on their timepoint of birth throughout the developing nervous  
213 system.

#### 214 [Dopaminergic neurons are a temporal neuronal subtype generated in the midbrain](#)

215 We next investigated if this temporal TF code is responsible for the establishment of neuronal  
216 populations with specific functions. Dopaminergic neurons are a neuronal population of  
217 medical interest because their degeneration causes Parkinson's disease. During development  
218 these neurons are born from the midbrain floor plate and can be discriminated based on the  
219 expression of the TFs *Lmx1a*, *Lmx1b* and *Pitx3* as well as the enzymes Tyrosine hydroxylase  
220 (TH) and the dopamine transporter *Slc6a3* (also known as *Dat*). Strikingly, previous  
221 characterization of neurons generated from the midbrain floor plate using a *Pitx3* transgenic  
222 reporter suggested that these neurons can be broadly subdivided into *Nfia/b* and *Zfhx3*  
223 expressing subsets. The *Zfhx3*-positive population expresses dopaminergic neuron markers  
224 such as *Slc6a3* and high levels of TH (Tiklová et al., 2019). By contrast, the *Nfi*-positive  
225 population lacked the molecular machinery for the synthesis of dopamine and expressed  
226 markers characteristic for excitatory neurons such as *Slc17a6* (also known as *vGlut2*) (Tiklová  
227 et al., 2019). These findings, in combination with our observation that *Zfhx3* and *Nfi* TFs define  
228 temporal neuronal populations in the midbrain suggest that midbrain dopaminergic neurons  
229 may constitute a temporal neuronal subtype born from the midbrain floor plate.

230 We therefore examined if *Zfhx3*-positive neurons are generated before *Nfia/b* positive  
231 neurons from the midbrain floor plate. Assays at e11.5 revealed widespread expression of  
232 *Zfhx3* in floor plate-derived *Lmx1b*-positive neurons (Figure 3A). At this stage *Nfib* expression  
233 just commenced in *Sox2*+ neural progenitors (Figure 3B). In contrast, at e13.5 numerous *Nfib*-  
234 positive neurons expressing *Lmx1b* were found in the vicinity of the midbrain floor plate (Figure  
235 3C,D), likely corresponding to the *N-Dat<sup>low</sup>* population (Tiklová et al., 2019). *Zfhx3*-positive  
236 neurons at this stage had migrated to a more lateral position (Figure 3C). These neurons co-  
237 expressed the *Zfhx* TFs, *Zfhx3* and *Zfhx4*, and also increased levels of TH (Figure 3E,F),

238 suggesting these populations correspond to the *AT-Dat<sup>high</sup>*, *T-Dat<sup>high</sup>* and *VT-Dat<sup>high</sup>* neurons  
239 described by Tiklová et al., 2019. These conclusions are also consistent with previous birth-  
240 dating experiments that concluded that the majority of TH-positive dopaminergic neurons are  
241 born before and around e12.5 (Bayer et al., 1995; Bye et al., 2012). Taken together, these  
242 data suggest that the sequence of temporal TF expression is preserved in neurons derived  
243 from the midbrain floor plate, that the expression of different temporal TFs correlates with the  
244 acquisition of different neuronal subtype identities in these neurons and that dopaminergic  
245 neurons correspond to the Zfhx3-positive temporal neuronal population.

#### 246 [The temporal TF code applies to in-vitro generated midbrain, hindbrain and spinal cord](#) 247 [neurons](#)

248 We next sought to investigate whether the temporal code was preserved in-vitro during the  
249 directed differentiation of ES cells to neurons with specific axial and dorsal-ventral identities  
250 (Gouti et al., 2014; Metzis et al., 2018; Sagner et al., 2018). We reasoned that, in-vitro putative  
251 global signalling cues, originating from distant signalling centres, should be absent.

252 We examined if the same sequence of temporal TF factor expression can be observed  
253 in stem-cell derived neurons with mid- and hindbrain and spinal cord identities. ES cells were  
254 differentiated to appropriate identities using established protocols (Gouti et al., 2014) (Figure  
255 4A), as confirmed by real-time quantitative polymerase chain reaction (RT-qPCR) for *Foxg1*,  
256 *Otx2*, *Hoxa4*, *Hoxb9* and *Hoxc8* (Figure S4A). As expected, cells differentiated to midbrain  
257 identity induced *Otx2*, but not the forebrain marker *Foxg1* or the hindbrain marker *Hoxa4*,  
258 which was induced in hindbrain conditions. By contrast, the posterior Hox genes *Hoxb9* and  
259 *Hoxc8* were only induced when cells were differentiated to a spinal cord identity. We next  
260 assayed the expression of the temporal TFs *Onecut2*, *Zfhx3*, *Nfia* and *Neurod2* under these  
261 differentiation conditions by flow cytometry from days 6 to 13 (Figures 4B and S4B). The  
262 overall expression dynamics of these markers observed in-vivo were preserved under the  
263 different conditions. Most neurons expressed *Onecut2* at days 6 and 7, while the proportion  
264 of *Zfhx3*-positive neurons increased between days 7 and 9 and *Nfia* and *Neurod2*-positive  
265 neurons were typically not detected before day 11. These results closely resemble our  
266 previous observations of the temporal patterning of neurons in the developing nervous system.

267 We next investigated if the progression of the temporal TF code is preserved in  
268 neurons with different dorsal-ventral identities. We have previously demonstrated that  
269 exposure of spinal cord progenitors to appropriate concentrations of the Sonic Hedgehog  
270 (*Shh*) pathway agonist (SAG) promotes the generation of progenitors and neurons with  
271 different dorsal-ventral identities (Sagner et al., 2018). We therefore focused on the spinal



272 cord condition and either ventralized cells by exposing them from day 3 to day 9 to 500 nM  
273 SAG, or dorsalised them in the absence of SAG. Samples for flow cytometry were collected  
274 at days 7, 9, and 11 (Figure 4A). Consistent with our previous observations (Sagner et al.,  
275 2018), in the absence of Shh pathway activation most progenitors expressed the dorsal  
276 progenitor marker Pax3, while prolonged high-level Shh pathway activation leads to the  
277 majority of progenitors acquiring a Nkx2.2-positive ventral p3 identity (Figure 4C,D).  
278 Consistent with this, most neurons generated in the absence of Shh pathway activation  
279 expressed the intermediate dorsal marker Lbx1, while Shh pathway activation lead to the  
280 generation of Sim1-positive V3 neurons (Figure S4C). We therefore refer to these conditions  
281 as dorsal and ventral, respectively. Assaying the expression of the temporal TFs in neurons  
282 in the ventral differentiation condition revealed similar expression dynamics for these markers  
283 as previously observed under dorsal spinal cord conditions, although notably a higher  
284 proportion of neurons expressed Nfia and Neurod2 at later stages of the differentiations  
285 (Figure 4B).

286 Based on these observations, we conclude that the temporal TF code is preserved in in-  
287 vitro generated neurons with different axial (midbrain, hindbrain and spinal cord) and dorsal-  
288 ventral identities. Furthermore, the time scale over which the temporal patterning unfolds is  
289 similar in-vivo and in-vitro, corresponding in both cases to approximately 4-5 days (in-vivo  
290 ~e9.5 – e13.5; in-vitro ~day 7 – day 11). These results argue against a model in which global  
291 signalling cues orchestrate the temporal patterning program. We note however, that this  
292 analysis also uncovered reproducible differences in the proportions of neurons expressing the  
293 respective markers between the different axial identities. Cells differentiated under hindbrain  
294 conditions induced late temporal TFs at a faster pace, while cells under midbrain conditions  
295 seemed to progress slowest to a later temporal identity. These differences may be indicative  
296 of cell-intrinsic programs that allow progenitors and/or neurons to progress through the  
297 temporal TF code at a speed characteristic for their axial identity.

### 298 Conserved temporal patterning of midbrain, hindbrain and spinal cord neural 299 progenitors

300 The generation of different neuronal subtypes from the same progenitors is arguably best  
301 understood in *Drosophila*. Here, aging neuroblasts sequentially express a series of TFs that  
302 define temporal identity windows for the generation of specific neuronal progeny (Doe, 2017).  
303 Similar processes are believed to underlie the temporal patterning of tissues in the vertebrate  
304 nervous system, however, the transcriptional programs that mediate this process are still  
305 relatively poorly understood (Holguera and Desplan, 2018; Oberst et al., 2019). We therefore  
306 asked if similar principles apply to the spinal cord. To this end, we analysed our in-vivo

307 scRNAseq data (Delile et al., 2019) to identify TFs that are consistently up- or downregulated  
308 in most progenitor domains during the neurogenic period (see Experimental Procedures). This  
309 analysis recovered in total 542 genes including 33 TFs (Figure 5A). Inspection of the  
310 expression dynamics of these TFs confirmed their differential temporal expression in  
311 progenitors from most dorsal-ventral domains (Figure S5A). As expected, this analysis  
312 recovered the gliogenic TFs Sox9 and the Nfi TFs (Nfia/b/x) that have previously been shown  
313 to be dynamically expressed during this time window in the developing spinal cord (Deneen  
314 et al., 2006; Stolt et al., 2003). To address if these transcriptional changes are preserved in  
315 progenitors in other regions of the nervous system, we characterized the expression dynamics  
316 of the 33 TFs in scRNAseq from the developing fore-, mid- and hindbrain (Manno et al., 2020).  
317 This analysis revealed largely preserved expression dynamics of the 33 TFs in these tissues  
318 (Figure 5B). We next tested if these genes display the same expression dynamics in neural  
319 progenitors with different axial identities in our in-vitro differentiations. Analysis of the gene  
320 expression dynamics of the 542 genes and 33 TFs using RNAseq data from in-vitro generated  
321 ventral neural progenitors from days 3-10 (Rayon et al., 2020) revealed that the general  
322 temporal pattern of gene expression is preserved under these culture conditions (Figure 5C).  
323 To test if the same dynamics can be also observed in in-vitro generated progenitors with  
324 midbrain, hindbrain or dorsal spinal cord identities, we performed RT-qPCRs for *Lin28a*,  
325 *Lin28b*, *Nr6a1*, *Sox9*, *Npas3*, *Zbtb20*, *Nfia*, *Nfib* and *Hopx* and quantified the proportion of  
326 Nfia-positive progenitors by flow cytometry (Figures 5D,E and S5B). These results confirmed  
327 shared expression dynamics for these marker genes in in-vitro differentiated neural  
328 progenitors with different axial identities. We conclude that, similar to neurons, neural  
329 progenitors throughout the nervous system undergo a shared temporal patterning program  
330 (Figure 5F).

### 331 [TGF \$\beta\$ controls the pace of the temporal program](#)

332 The TGF $\beta$  signalling pathway controls the timing of the switch from motor neuron to  
333 serotonergic neuron production in p3 progenitors in the vertebrate hindbrain and promotes  
334 Nfia expression and the formation of glia in neural stem cells (Dias et al., 2014; Tchieu et al.,  
335 2019). In the spinal cord, the signalling pathway is active in progenitors during the neurogenic  
336 period and several members of the TGF $\beta$  family are expressed at early developmental stages  
337 in the adjacent notochord, floor plate, mesoderm and at later developmental stages by  
338 different populations of neurons (Dutta et al., 2018; Garcia-Campmany and Marti, 2007; Shi  
339 and Liu, 2011). We therefore asked if the pathway is active in progenitors in our in-vitro  
340 differentiations. To do so, we exposed dorsal neural progenitors from day 5 to the TGF $\beta$   
341 signalling inhibitor SB431542 (Inman et al., 2002) and assayed the expression of the target

342 gene *Smad7* 48 and 96 hours later (Garcia-Campmany and Marti, 2007). As expected,  
343 pathway inhibition resulted in a significant reduction of *Smad7* expression (Figure 6B). These  
344 results confirm that the TGF $\beta$  pathway is active in neural progenitors in-vitro and suggest that  
345 TGF $\beta$  signalling is a good candidate to control the maturation of progenitors and the timing of  
346 temporal TF expression in in-vitro generated spinal cord neurons

347 To test this hypothesis, we exposed progenitors under dorsal and ventral spinal cord  
348 conditions to SB431542 from Day 5 onwards (Figure 6A). This treatment did not result in a  
349 change in the proportion of progenitors expressing Pax3 or Nkx2.2, suggesting it does not  
350 strongly affect the dorsal-ventral identity of neural progenitors (Figure 6C), but caused a  
351 significant delay in the induction of the late marker *Nfia* in neural progenitors and the  
352 expression of the intermediate and late-born markers *Zfhx3*, *Nfia* and *Neurod2* in neurons  
353 under dorsal and ventral conditions (Figure 6D,E). To further investigate the consequences of  
354 TGF $\beta$  pathway inhibition on the temporal patterning of neural progenitors, we additionally  
355 assayed the consequences of ectopic TGF $\beta$  pathway activation and inhibition on the  
356 expression of the early genes *Lin28a*, *Lin28b* and the late genes *Sox9*, *Nfia*, *Nfib* and *Nfix* by  
357 RT-qPCR (Figure 6F). This analysis revealed a faster downregulation of early progenitor and  
358 earlier induction of late progenitor markers upon exposure to 2ng/ml TGF $\beta$ 2 ligand (Figure  
359 6G), while the opposite was true when the TGF $\beta$  pathway was inhibited using 10  $\mu$ M  
360 SB431542 (Figure 6H). Together, these experiments demonstrate that TGF $\beta$  signalling  
361 controls the speed of progenitor maturation and the timing of temporal TF expression in in-  
362 vitro generated spinal cord neurons.

### 363 [Nfia and Nfib are required for the efficient generation of late-born spinal cord neurons](#)

364 Nfi TFs are best known for promoting the switch from neurogenic to gliogenic progenitors  
365 (Deneen et al., 2006; Kang et al., 2012; Matuzelski et al., 2017; Tchieu et al., 2019). However,  
366 the expression of *Nfia* and *Nfib* in progenitors in the mouse spinal cord commences between  
367 e10.5 and e11.5, approximately 2 days before neurogenesis ceases and gliogenesis starts.  
368 Furthermore, these TFs are expressed in late-born neurons in the developing midbrain,  
369 hindbrain and spinal cord (Delile et al., 2019; Tiklová et al., 2019) (Figure 2D,I). In the retina,  
370 Nfi TFs are required for the specification of Müller glia and, importantly, bipolar cells, a late-  
371 born neuronal subtype (Clark et al., 2019). Nfi TFs also play important roles during the  
372 generation and postmitotic maturation of cerebellar granule neurons (Ding et al., 2013; Harris  
373 et al., 2015; Wang et al., 2010). These findings raise the possibility that Nfi TFs are also  
374 required for the specification of late-born neuronal subtypes in other parts of the central  
375 nervous system. To test this possibility, we generated an *Nfia*; *Nfib* double-mutant ES cell line

376 by CRISPR/Cas9-induced non-homologous end joining. Because *Nfia* and *Nfib* act  
377 redundantly during the induction of gliogenesis in the spinal cord and the formation of bipolar  
378 cells and Müller glia in the retina (Clark et al., 2019; Deneen et al., 2006), we decided to  
379 directly focus on analysing the double mutant to rule out any potential redundancy between  
380 both genes. Electroporations of guide RNAs targeting the 2<sup>nd</sup> coding exons of both genes  
381 resulted in double-heterozygous frameshift deletions of 20 and 11 base pairs in *Nfia* and 10  
382 and 8 base pairs in *Nfib* (Figure S7A,B). Immunofluorescence assays of dorsal differentiations  
383 at Day 10 of differentiation, a timepoint when both proteins are normally detected at high-  
384 levels in progenitor nuclei in control differentiations, confirmed the absence of both proteins  
385 (Figure S7C,D).

386 Both in-vitro and in the developing spinal cord, *Neurod2*-positive neurons are born after  
387 *Nfia* and *Nfib* expression commenced in progenitors (Delile et al., 2019) (compare Figures 4B  
388 and 5E). Motif analysis (Fornes et al., 2020) revealed multiple *Nfi* motifs in close proximity to  
389 the *Neurod2* gene and analysis of recently published *Nfia*, *Nfib* and *Nfix* ChIP-seq datasets  
390 from the murine cerebellum (Fraser et al., 2020) confirmed binding of all 3 TFs to these sites  
391 (Figure 7A). We thus focused on assaying *Neurod2* expression to determine the importance  
392 of *Nfia* and *Nfib* for the generation of late-born neurons in our in-vitro cultures. As our previous  
393 characterizations revealed the highest proportion of *Neurod2*-positive neurons are generated  
394 in ventral differentiations (Figure 4B), we focused on this condition. Characterizing the  
395 proportion of neurons expressing *Neurod2* by flow cytometry revealed a marked reduction in  
396 the percentage of *Neurod2*-positive neurons in *Nfia*; *Nfib* double mutants (Figure 7B-D). Taken  
397 together, these data suggest that *Nfia* and *Nfib* are required for the expression of *Neurod2* in  
398 late-born neurons in the spinal cord and support a model in which the specification of late-  
399 born neuronal subtypes is tightly coupled to the signals and transcriptional programs that  
400 mediate the switch from neuro- to gliogenesis throughout the nervous system.

## 401 [Discussion](#)

### 402 [Neuronal diversity from the superposition of spatial and temporal patterning programs](#)

403 The recent advent of single cell sequencing technologies, such as RNA sequencing, has  
404 enabled the profiling of cell-type diversity at unprecedented scale (Briscoe and Marín, 2020).  
405 Especially in the nervous system, this has led to the discovery of a much greater complexity  
406 and molecular heterogeneity of cell types than previously anticipated, raising the question of  
407 how this diversity arises. The superposition of multiple patterning systems that act along  
408 different spatiotemporal axes provides a solution to this problem as it enables the  
409 combinatorial specification and organisation of cell types using relatively simple patterning

410 schemes (Erclik et al., 2017). Here we provide evidence of a temporal patterning programme,  
411 operating in parallel to spatial mechanisms, throughout the vertebrate nervous system.

412 The same temporal sequence of TF expression is observed in forebrain, midbrain,  
413 hindbrain, spinal cord, retina, and in ES cell-derived neurons with various axial identities. We  
414 also defined a temporal patterning program within neural progenitors and demonstrate that  
415 TGF $\beta$  signalling controls the pace of the program. Moreover, we find that the TFs *Nfia* and  
416 *Nfib*, typically considered markers of gliogenic potential, are required for the generation of late-  
417 born neurons in an in-vitro model of spinal cord development. Taken together, our results  
418 suggest that the conserved temporal patterning of progenitors and neurons mediated by TGF $\beta$   
419 signalling contributes to the generation of neuronal diversity in large parts of the nervous  
420 system, including disease-relevant cell types such as midbrain dopaminergic neurons.

421 The temporal program functions in parallel to the well-established spatial patterning of  
422 the dorsal-ventral and anterior-posterior axes of the neural tube, thus enabling the generation  
423 of a combinatorially increasing number of neuronal subsets from the superposition of a limited  
424 number of TFs that delineate specific spatial and temporal identities. This mechanism could  
425 be extended further. For example, the temporal patterning of *Drosophila* medulla neuroblasts  
426 is defined by the sequential expression of 5 TFs, however, the expression of these temporal  
427 TFs in aging neuroblasts is not mutually exclusive – instead there are periods of co-expression  
428 of sequentially expressed TFs (Li et al., 2013). Similar observations have been made in the  
429 neuroblast lineages in the *Drosophila* embryo and mushroom body (Averbukh et al., 2018; Liu  
430 et al., 2019). Such co-expression of temporal TFs has been proposed to designate additional  
431 temporal windows during which further neuronal subtypes are generated (Averbukh et al.,  
432 2018; Li et al., 2013). Our data, so far, do not support such a model in the spinal cord, as the  
433 expression of the different pairs of temporal TFs we analysed in spinal cord neurons were  
434 mutually exclusive (Figure S2). We note, however, that the respective temporal identities are  
435 defined by co-expression of multiple orthologous TFs and we analysed a limited number of TF  
436 pairs. Moreover, characterization of spinal V1 interneuron diversity has revealed differential  
437 expression of *Onecut1* and *Onecut2* in some V1 subtypes, some of which also expressed  
438 *Zfhx4* (Gabbitto et al., 2016). Taken together, these observations raise the possibility that the  
439 temporal TF code could further diversify the number of neurons generated in each domain  
440 based on the combinatorial co-expression of distinct pairs of temporal TFs. Future  
441 experiments are required to test this hypothesis.

442 Concomitantly with neurons, neural progenitors throughout the vertebrate nervous  
443 system undergo a temporal patterning program (Figure 5A,B). Components of this program,

444 including Sox9 and Nfia/b, have previously been implicated in the transition from neurogenesis  
445 to gliogenesis (Deneen et al., 2006; Kang et al., 2012; Namihira et al., 2009; Scott et al., 2010;  
446 Stolt et al., 2003). However, the expression of these factors precedes the onset of gliogenesis.  
447 The expression of Sox9 in neural progenitors coincides with the switch from early Onecut2-  
448 positive to intermediate Pou2f2 and Zfhx3-positive neurons and the induction of Nfia/b  
449 correlates with the later transition. Moreover, the loss of generation of late neuronal subtypes  
450 in neural progenitors lacking Nfia/b is consistent with the involvement of these TFs in the  
451 neuronal temporal program as well as the gliogenic switch (Figure 7). This raises the possibility  
452 that the transition of neural progenitors from exclusively neurogenesis to subsequent  
453 gliogenesis is part of the same temporal patterning program operating in the nervous system.  
454 This would be analogous to the temporal program in *Drosophila* neuroblasts which also  
455 controls the identity of neurons and glia cells.

#### 456 [TGF \$\beta\$ signalling regulates temporal patterning in the nervous system](#)

457 Our results indicate that the TGF $\beta$  pathway is an important regulator of the pace of progenitor  
458 maturation and the timing of temporal TF expression in neurons. This is in agreement with  
459 previous findings. In the hindbrain, TGF $\beta$ 2 signalling controls the timing of the switch from  
460 MNs to serotonergic neurons by repressing the TF Phox2b in neural progenitors (Dias et al.,  
461 2014). In addition, another TGF $\beta$  family member, Gdf11, controls the timing of retinal ganglion  
462 cell specification in the vertebrate retina, the timing of MN subtype specification, and the switch  
463 from dl5 to late-born dlL<sub>B</sub> neurons in the spinal cord (Kim et al., 2005; Shi and Liu, 2011). The  
464 connection between these roles of TGF $\beta$  signalling and its role in directing the temporal  
465 patterning programs of progenitors and neurons is currently unclear but, taken together, the  
466 results implicate multiple ligands of the TGF $\beta$  family in controlling the temporal patterning of  
467 the mammalian nervous system. Notably, Activin signalling is involved in controlling the timing  
468 of fate switches in the *Drosophila* mushroom body and, similar to observations in vertebrates,  
469 inhibition of Activin signalling results in a delay of temporal fate progression in this system  
470 (Rossi and Desplan, 2020). These findings suggest a deep evolutionary origin for the role of  
471 the TGF $\beta$  pathway in controlling temporal patterning and the diversification of cell types in the  
472 developing nervous system bilaterians.

473 The timing of switches in temporal TF expression occur at approximately similar times  
474 throughout the developing nervous system and during the in-vitro differentiation of neurons  
475 with different axial and dorsal-ventral identities. This raises the question how signals, from  
476 locally secreted sources, achieve an apparently globally synchronised effect and what the  
477 source of TGF $\beta$  might be in the in-vitro differentiations. A solution to this puzzle could be that



478 Gdf11 and related ligands are expressed in new-born neurons in the spinal cord (Shi and Liu,  
479 2011). Notably, analysis of Gdf11 expression suggests that this expression pattern is  
480 preserved in the hindbrain and midbrain. Such a model, in which the temporal progression of  
481 progenitors is coupled to a ligand secreted by neurons that signals back to progenitors has  
482 the advantage that it provides a means to ensure that the correct proportion of neurons with  
483 a specific temporal identity are produced before progenitors switch to the next phase. A  
484 prediction of such a model is that local increases in neurogenesis would lead to a local  
485 acceleration of temporal patterning in progenitors. Indeed, several genes involved in the onset  
486 of gliogenesis, such as *Sox9*, *Nfia* and *Fgfr3*, are first expressed in the ventral spinal cord  
487 (Deneen et al., 2006; Kang et al., 2012; Stolt et al., 2003), where MNs differentiate at higher  
488 rate at early developmental stages (Kicheva et al., 2014; Novitsch et al., 2001). Further  
489 experiments that explore the connection between Gdf11, neurogenesis rate and temporal  
490 patterning are required to test this hypothesis.

491 The data show that the temporal pattern of both neurons and progenitors continues to  
492 advance in the absence of TGF $\beta$  pathway activity. This is consistent with observations from  
493 the ventral hindbrain, where ablation of *Tgfr1* delays but does not abrogate the switch from  
494 MNs to serotonergic neurons and in Gdf11 mutants in the spinal cord, where the onset of  
495 oligodendrocyte formation is delayed but not prevented (Dias et al., 2014, 2020; Shi and Liu,  
496 2011). Together this suggests that other extrinsic signals, or cell-intrinsic timers, must exist  
497 that promote temporal progression. A potential candidate signal that may oppose the activity  
498 of TGF $\beta$  is retinoic acid (RA), which has been shown to drive the generation of Onecut-positive  
499 Renshaw cells in an in-vitro model of V1 subtype diversity (Hoang et al., 2018). Furthermore,  
500 the rate-limiting enzyme for RA synthesis is down-regulated in somites, adjacent to the neural  
501 tube, between e9.5 and e10.5 (Niederreither et al., 1997), coinciding with the switch from  
502 Onecut to *Zfhx3* positive neurons. In addition, several pathways, such as Neuregulins, Notch,  
503 FGF and JAK/STAT have been shown to promote gliogenesis (Miller and Gauthier, 2007;  
504 Namihira et al., 2009; Vartanian et al., 1999). Given the pivotal role of Nfi TFs in this process,  
505 one or more of these signals may promote the acquisition of a late Nfi-positive progenitor  
506 identity. The genetic and experimental accessibility of in-vitro models will allow these  
507 possibilities to be tested.

## 508 [Temporal patterning of in-vitro generated neurons](#)

509 In-vitro generated neurons are widely used for disease modelling and have the potential  
510 to offer novel therapeutic avenues to tackle nervous system injuries and neurodegenerative  
511 diseases (Fischer et al., 2020; Sances et al., 2016; Tao and Zhang, 2016). A better

512 understanding of the molecular mechanisms responsible for neuronal diversity contributes to  
513 the rational design of in-vitro differentiation protocols to generate cell types best-suited for  
514 such applications. Our work demonstrates that the temporal patterning of neurons and  
515 progenitors is conserved in-vitro, providing a new dimension for assessing the identity of  
516 progenitors and neurons obtained in culture. Furthermore, the observation that manipulating  
517 TGF $\beta$  signalling can accelerate or slow-down the progression of temporal patterning opens up  
518 the possibility to use such perturbations to increase the yield of progenitors and neurons with  
519 desired spatial and temporal identities.

520 Many applications of in-vitro generated neurons and progenitors require large numbers  
521 of cells with defined identities. These are often generated by expanding progenitors using  
522 treatments with signals such as EGF and/or FGF before exposing the resulting progenitor  
523 populations to differentiation stimuli. Such prolonged expansion phases might result in the  
524 preferential generation of neurons with late temporal identities. This might be at least partially  
525 counter-acted by the incorporation of TGF $\beta$ -pathway inhibitors. Indeed, treatment with  
526 SB431542 in combination with other small molecules has been demonstrated to enable long-  
527 term self-renewal of neural stem cells for more than 30 passages (Li et al., 2011). Another  
528 promising approach to generate neurons with defined identities is reprogramming of  
529 pluripotent cells or somatic cells, such as fibroblasts or astrocytes, using specific cell-fate  
530 converting cocktails of transcription regulators. Notably, the reprogramming of ES cells to  
531 different types of neurons resulted in expression of Onecut TFs (Aydin et al., 2019; Mazzoni  
532 et al., 2013), suggesting such approaches might preferentially generate the earliest temporal  
533 identities. The addition of temporal TFs that define later stages of the differentiation program  
534 to these reprogramming cocktails might expand the toolbox for the efficient generation of a  
535 wider-range of neuronal subtypes with desired temporal identities for in-vitro disease  
536 modelling and future clinical applications.

## 537 [Experimental Procedures](#)

### 538 [Animal Welfare](#)

539 Animal experiments were performed under UK Home Office project licenses (PD415DD17)  
540 within the conditions of the Animal (Scientific Procedures) Act 1986. All experiments were  
541 conducted using outbred UKCrI:CD1 (ICR) (Charles River) mice.

### 542 [Immunofluorescent staining and microscopy](#)

543 Embryos were fixed at the indicated stages in 4% PFA (Thermo Fisher Scientific) in PBS on  
544 ice, cryoprotected and dissected in 15% ice-cold sucrose in 0.12M PB buffer, embedded in  
545 gelatine and 14  $\mu$ m sections taken. In-vitro generated cells were fixed for 15 minutes in 4%  
546 PFA in PBS at 4 degrees. 30 minutes blocking and primary antibody incubation over night at  
547 4 degrees was performed using PBS + 0.1% Triton (PBS-T) + 1% BSA. A complete list of  
548 antibodies is available in Table S1. The next day, samples were washed 3x 30 minutes in  
549 PBS-T and incubated with secondary antibodies in PBS-T + 1% BSA for 1 hour at room  
550 temperature. Secondary antibodies used throughout the study were raised in donkey (Life  
551 Technologies, Jackson ImmunoResearch). Alexa488 and Alexa568-conjugated secondary  
552 antibodies were used at 1:1000, Alexa647-conjugated antibodies at 1:500. Samples were  
553 washed 3 more times in PBS-T and then mounted in Prolong Antifade (Molecular Probes).

554 For EdU-labelling, mice were intraperitoneally injected with 3  $\mu$ l/gramm body weight EdU  
555 diluted in PBS at the indicated stages. EdU was detected using Alexa647 Click-iT EdU  
556 Imaging Kit (Invitrogen C10340) according to the manufacturer's specifications. At least 4  
557 sections from different animals were analysed for each timepoint.

558 Stainings of in-vitro differentiations were acquired on a Zeiss Imager.Z2 microscope  
559 equipped with an Apotome.2 structured illumination module and a 20 $\times$  air objective (NA=0.75).  
560 Cryo-sections were imaged using a Leica SP8 equipped with a 40x oil PL APO CS2 objective  
561 (NA=1.30). Tissue sections were tiled using 10% overlap between adjacent tiles and merged  
562 using LAS X software.

### 563 [Image analysis](#)

564 Image analysis was performed in Fiji (<http://fiji.sc/Fiji>) and Python3.7 (<http://www.python.org>).  
565 e13.5 mouse neural tube transverse sections were manually cropped using Fiji and then  
566 processed using a custom Python pipeline. Cell nuclei were segmented using an adaptive  
567 threshold and watershed algorithm on the DAPI channel. Parameters for proper segmentation  
568 and filtering were manually optimized for each set of images. Segmented objects were further  
569 filtered based on area to fit the expected nuclei dimensions. Neuronal nuclei were  
570 distinguished from those of progenitors either by presence of the neuronal marker HuC or  
571 absence of Sox2 staining. For each neuronal nucleus the mean intensity of the temporal TFs  
572 and EdU was then calculated.

573 Data analysis and plotting was performed in R (<https://www.r-project.org>). For each  
574 section, intensities in nuclei were first normalized between 0 and 1. To remove outliers 0.3%  
575 of the brightest and dimmest objects were discarded. Objects were counted as positive for

576 EdU or expression of temporal TFs if their normalized intensity was greater than 0.25.  
577 Percentage of EdU-positive nuclei expressing temporal TFs was then plotted using ggplot2  
578 (Wickham, 2016).

## 579 ESC culture and differentiation

580 HM1 mouse ESCs (Thermo Fisher Scientific) were maintained and differentiated as described  
581 previously (Gouti et al., 2014; Metzis et al., 2018; Sagner et al., 2018). In brief, ESCs were  
582 maintained on a layer of mitotically inactivated mouse embryonic fibroblast (feeders) in ES cell  
583 medium + 1,000 U/ml LIF. For differentiation, ESCs were dissociated using 0.05% Trypsin  
584 (Gibco). Feeder cells were removed by replating cells for 25 minutes on a tissue culture plate.  
585 60-80,000 cells were plated onto 0.1% Gelatin (Sigma) coated 35 mm CellBIND dishes  
586 (Corning) into N2B27 medium + 10 ng/ml bFGF. Differentiation protocols for progenitors and  
587 neurons with different axial and dorsal-ventral identities are shown in Figure 4A. Differentiation  
588 protocols for activation and inhibition of the TGF $\beta$  pathway using TGF $\beta$ 2 (R&D Systems) or  
589 10  $\mu$ M SB431542 (Tocris) respectively are shown in Figure 6A,F. For midbrain differentiation  
590 cells were kept in N2B27 medium with addition of 10 ng/ml bFGF until Day 3. To generate  
591 hindbrain identity 100 nM RA (Sigma) and 500 nM SAG (Calbiochem) were supplemented  
592 together at Day 3 and 4. For spinal cord differentiations, cells were exposed to 5  $\mu$ M  
593 CHIR99021 (Axon) between days 2 and 3 and then supplemented with 100 nM RA (Sigma)  
594 until day 5. For ventral differentiations, cells were additionally exposed to 500 nM SAG  
595 (Calbiochem) from days 3 to 9.

## 596 Generation of *Nfia*; *Nfib* double mutant ESCs

597 For generation of *Nfia*; *Nfib* double mutant ESCs CRISPR guide RNAs were cloned into pX459  
598 plasmid obtained from Addgene (# 62988), according to Ran et al., 2013. ESCs were  
599 electroporated using Nucleofector II (Amaxa) and mouse ESC Nucleofector kit (Lonza).  
600 Afterwards, cells were replated onto 10-cm CellBind plates (Corning) and maintained in 2i  
601 medium + LIF. For selection, cells were first treated with 1.5  $\mu$ g/ml Puromycin (Sigma) for two  
602 days and afterwards maintained in 2i medium + LIF until colonies were clearly visible.  
603 Individual colonies were picked using a 2- $\mu$ l pipette, dissociated in 0.25% Trypsin (Gibco), and  
604 replated onto feeder cells in ES-medium + 1,000 U/ml LIF in a 96-well plate. Mutations in *Nfia*  
605 and *Nfib* were analyzed by PCR over the targeted regions and verified by Sanger sequencing.  
606 Overlapping peaks arising from heterozygous indels were deconvolved using CRISP-ID  
607 (Dehairs et al., 2016) (Figure S6A,B). Loss of *Nfia* and *Nfib* protein was further confirmed by  
608 immunofluorescent staining at day 10 of the differentiation (Figure S6C,D).

## 609 Flow Cytometry

610 In-vitro differentiations were dissociated at the indicated timepoints using 0.05% Trypsin  
611 (Gibco). Live/Dead cell staining was performed using LIVE/DEAD Fixable Near-IR Dead Cell  
612 Stain Kit (Invitrogen) for 30 minutes on ice. Immediately afterwards cells were spun-down for  
613 2 min at 1000xg and fixed in 4% PFA for 12 minutes on ice. Fixed cells were spun-down,  
614 resuspended in 500  $\mu$ l PBS, and stored at 4 degrees for up to 2 weeks.

615 For staining 1.5 – 2 million cells were used. Cells were spun-down and incubated with  
616 antibodies in PBS-T + 1% BSA. If primary and secondary antibodies were used, cells were  
617 incubated in primary antibody solution over night. Directly-conjugated antibodies or secondary  
618 antibodies were applied for 1 hour at room temperature. A complete list of antibodies used for  
619 flow cytometry is supplied in Table S2. Flow cytometry analysis was performed using BD LSR  
620 Fortessa analyzers (BD Biosciences). Data analysis was performed using FlowJo (v10.4.1)  
621 and plotted using Graphpad Prism 7. The general gating strategy is outlined in Figure S4B.  
622 Progenitor and neuronal cell populations were discriminated based on Sox2 and Tubb3  
623 antibody staining (Figure S4B). Percentages of Onecut2, Neurod2 and Zfhx3-positive neurons  
624 were calculated by applying a threshold at which 1-2% of Sox2+ progenitors in the same  
625 sample were counted as positive. Percentage of Nfia-positive neurons and progenitors was  
626 determined using a global threshold for all datasets. Data was plotted and statistical analysis  
627 performed in GraphPad Prism 8. Graphs throughout the manuscript show means  $\pm$  standard  
628 deviation of all conducted replicates. Statistical significance was assessed using unpaired t-  
629 tests. A summary of the percentage of positive cells, replicate number and p-values is provided  
630 in Table S3. Significance values throughout the manuscript are indicated by  $p < 0.001 = ***$ ,  
631  $p < 0.01 = **$ ,  $p < 0.05 = *$ .

## 632 RT-qPCR

633 Total RNA was isolated from cells at the indicated time points using Qiagen RNeasy kit  
634 according to the manufacturers instructions. Genomic DNA was removed by digestion with  
635 DNase I (Qiagen). cDNA synthesis was performed using SuperScript III (Invitrogen) and  
636 random hexamers. qPCR was performed using PowerUp SYBR Green Master Mix (Thermo  
637 Fisher Scientific) using 7900HT Fast Real time PCR (Applied Biosystems), QuantStudio 5 or  
638 QuantStudio 12K Flex Real-Time PCR Systems (Thermo Fisher Scientific). qPCR primers  
639 were designed using NCBI tool Primer BLAST and are listed in Table S4. All experiments were  
640 conducted at least in biological triplicates for each timepoint analysed. Expression values were  
641 normalized to  $\beta$ -actin. Data was plotted and statistical analysis performed in GraphPad Prism  
642 8. Graphs throughout the manuscript show means  $\pm$  standard-deviation of all replicates.

## 643 [scRNAseq data analysis](#)

644 scRNAseq analysis was performed using R-Studio v1.2.1335 using R v3.5.2. A complete R  
645 script describing the scRNAseq analysis performed in this paper is available at  
646 [https://github.com/sagnera/tTF\\_paper\\_2020](https://github.com/sagnera/tTF_paper_2020)

## 647 [Differential gene expression analysis in spinal cord neural progenitors](#)

648 scRNAseq data from e9.5-e13.5 spinal cord neural progenitors including subtype annotations  
649 were obtained from Delile et al., 2019. dp6 progenitors were excluded from this analysis due  
650 to low numbers in the dataset. For each progenitor domain, differential gene expression  
651 between progenitors from different embryonic days was performed using Seurat v3.1.4 (Stuart  
652 et al., 2019) using the “FindAllMarkers” function with settings `min.pct = 0.25` and  
653 `logfc.threshold = 0.25`. Only genes detected in more than 7 progenitor domains were retained.  
654 TFs were identified based on a list of TFs encoded in the mouse genome obtained from  
655 AnimalTFDB3.0 (Hu et al., 2019). Heatmaps in Figure 5A show log-scaled and z-scored gene  
656 expression.

## 657 [Analysis of temporal TFs in the mouse retina](#)

658 scRNAseq of the developing retina (Clark et al., 2019) was downloaded from  
659 [https://github.com/gofflab/developing\\_mouse\\_retina\\_scRNASeq](https://github.com/gofflab/developing_mouse_retina_scRNASeq) and imported into Seurat  
660 v3.1.4 (Stuart et al., 2019). Cells were filtered based on age (e14, e16, e18 and P0), cell type  
661 (RPCs, Neurogenic Cells, Photoreceptor Precursors, Cones, Rods, Retinal Ganglion Cells,  
662 Amacrine Cells, Horizontal Cells), number of reads in each cell (`nFeature > 800` and `nFeature`  
663 `< 6000`) and percentage of reads in mitochondrial genes (`percent.mt < 6`). Only cells annotated  
664 as Horizontal Cells, Amacrine Cells, Retinal Ganglion Cells, Rods and Cones were used for  
665 the time-stratified heatmap of temporal TF expression.

## 666 [Expression dynamics of temporal TFs in the fore-, mid- and hindbrain](#)

667 Annotated scRNAseq data from the developing fore-, mid- and hindbrain was downloaded  
668 from mousebrain.org (Manno et al., 2020). Cells were assigned fore-, mid- and hindbrain  
669 identity based on the “Tissue” column of the provided loom file. To account for the different  
670 sequencing depths between cells, readcounts were normalized by multiplying the counts in  
671 each cell with 10,000 divided by the total number of UMIs in this cell. Mean expression and  
672 ratio of expressing cells for the indicated temporal TFs and regions were calculated in R. Data  
673 was plotted using ggplot2 (Wickham, 2016). Heatmaps in Figure 5B show log-scaled and z-  
674 scored gene expression.



## 675 [Comparison with in-vitro RNAseq data](#)

676 RNAseq data from D3-D10 ventral spinal cord differentiations (Rayon et al., 2020)  
677 (GSE140748) was used. Gene expression per timepoint was averaged over all 3 provided  
678 replicates. Only data from full days of differentiation (D3, D4, D5, D6, D7, D8, D9, D10; D0-  
679 D7 in the provided data files) was used for further analysis. Heatmaps in Figure 5C show log-  
680 scaled and z-scored gene expression.

## 681 [Alignment of Nfia/b/x ChIP-seq data](#)

682 Nfia/b/x ChIP-seq data from Fraser et al., 2020 was downloaded from the GEO database  
683 (GSE146793) and aligned to mm10 using the nf-core ChIP-seq pipeline v1.1.0 (Ewels et al.,  
684 2020).

## 685 [Acknowledgements](#)

686 We thank all members of the Briscoe lab for help, advice, reagents and critical feedback. We  
687 acknowledge scientific support by the Crick Science and Technology platforms, in particular  
688 the Biological Research Facility, Equipment Park, Flow Cytometry and Light Microscopy  
689 facilities. We thank M.J. Delás for help with flow cytometry; Thomas Müller, Carmen  
690 Birchmeier and Siew-Lan Ang for kindly sharing antibodies; and Nancy Papalopulu, Tiago Rito  
691 and François Guillemot for comments on the manuscript.

## 692 [Funding](#)

693 This work was supported by the Francis Crick Institute, which receives its core funding from  
694 Cancer Research UK, the UK Medical Research Council, and the Wellcome Trust (all under  
695 FC001051). J.B. is also funded by the European Research Council under European Union  
696 (EU) Horizon 2020 research and innovation program grant 742138. A.S. acknowledges  
697 funding by a Human Frontier Science Program postdoctoral fellowship (LTF000401/2014-L)  
698 and a University of Manchester Presidential Fellowship. I.Z. is supported by Cancer Research  
699 UK (C157/A23459).

## 700 [Author Contributions](#)

701 Conceptualization: A.S., J.B.; Methodology: A.S., I.Z., T.W., M.M., J.B.; Software: A.S., J.L.;  
702 Investigation: A.S., I.Z., T.W., M.M.; Resources: T.W.; Writing - original draft: A.S., J.B.;

703 Writing - review & editing: A.S., I.Z., T.W., J.L., J.B.; Supervision: A.S., J.B.; Project  
704 administration: J.B.; Funding acquisition: A.S., J.B.

## 705 Competing financial interests

706 The authors declare no competing financial interests.

## 707 References

- 708 Andersson, O., Reissmann, E., and Ibáñez, C.F. (2006). Growth differentiation factor 11 signals through the  
709 transforming growth factor- $\beta$  receptor ALK5 to regionalize the anterior-posterior axis. *EMBO Rep.* 7, 831–837.
- 710 Averbukh, I., Lai, S.-L., Doe, C.Q., and Barkai, N. (2018). A repressor-decay timer for robust temporal patterning  
711 in embryonic *Drosophila* neuroblast lineages. *Elife* 7, 1–19.
- 712 Aydin, B., Kakumanu, A., Rossillo, M., Moreno-Estellés, M., Garipler, G., Ringstad, N., Flames, N., Mahony, S.,  
713 and Mazzoni, E.O. (2019). Proneural factors *Ascl1* and *Neurog2* contribute to neuronal subtype identities by  
714 establishing distinct chromatin landscapes. *Nat. Neurosci.* (in press).
- 715 Bayer, S.A., Wills, K. V., Triarhou, L.C., and Ghetti, B. (1995). Time of neuron origin and gradients of  
716 neurogenesis in midbrain dopaminergic neurons in the mouse. *Exp. Brain Res.* 105, 191–199.
- 717 Benito-Gonzalez, A., and Alvarez, F.J. (2012). Renshaw Cells and Ia Inhibitory Interneurons Are Generated at  
718 Different Times from p1 Progenitors and Differentiate Shortly after Exiting the Cell Cycle. *J. Neurosci.* 32, 1156–  
719 1170.
- 720 Bikoff, J.B., Gabitto, M.I., Rivard, A.F., Drobac, E., Machado, T.A., Miri, A., Brenner-Morton, S., Famojure, E.,  
721 Diaz, C., Alvarez, F.J., et al. (2016). Spinal Inhibitory Interneuron Diversity Delineates Variant Motor  
722 Microcircuits. *Cell* 165, 207–219.
- 723 Briscoe, J., and Marin, O. (2020). Looking at neurodevelopment through a big data lens. *Science* 369.
- 724 Bröhl, D., Strehle, M., Wende, H., Hori, K., Bormuth, I., Nave, K.A., Müller, T., and Birchmeier, C. (2008). A  
725 transcriptional network coordinately determines transmitter and peptidergic fate in the dorsal spinal cord. *Dev.*  
726 *Biol.* 322, 381–393.
- 727 Bye, C.R., Thompson, L.H., and Parish, C.L. (2012). Birth dating of midbrain dopamine neurons identifies A9  
728 enriched tissue for transplantation into Parkinsonian mice. *Exp. Neurol.* 236, 58–68.
- 729 Cepko, C. (2014). Intrinsically different retinal progenitor cells produce specific types of progeny. *Nat. Rev.*  
730 *Neurosci.* 15, 615–627.
- 731 Clark, B.S., Stein-O'Brien, G.L., Shiao, F., Cannon, G.H., Davis-Marcisak, E., Sherman, T., Santiago, C.P.,  
732 Hoang, T. V., Rajaii, F., James-Esposito, R.E., et al. (2019). Single-Cell RNA-Seq Analysis of Retinal  
733 Development Identifies NFI Factors as Regulating Mitotic Exit and Late-Born Cell Specification. *Neuron* 1–16.
- 734 Dehairs, J., Talebi, A., Cherifi, Y., and Swinnen, J. V. (2016). CRISP-ID: Decoding CRISPR mediated indels by  
735 Sanger sequencing. *Sci. Rep.* 6, 1–5.
- 736 Delile, J., Rayon, T., Melchionda, M., Edwards, A., Briscoe, J., and Sagner, A. (2019). Single cell transcriptomics  
737 reveals spatial and temporal dynamics of gene expression in the developing mouse spinal cord. *Development*  
738 146, dev173807.

- 739 Deneen, B., Ho, R., Lukaszewicz, A., Hochstim, C.J., Gronostajski, R.M., and Anderson, D.J. (2006). The  
740 Transcription Factor NFIA Controls the Onset of Gliogenesis in the Developing Spinal Cord. *Neuron* 52, 953–  
741 968.
- 742 Deng, Q., Andersson, E., Hedlund, E., Alekseenko, Z., Coppola, E., Panman, L., Millonig, J.H., Brunet, J.F.,  
743 Ericson, J., and Perlmann, T. (2011). Specific and integrated roles of Lmx1a, Lmx1b and Phox2a in ventral  
744 midbrain development. *Development* 138, 3399–3408.
- 745 Deska-Gauthier, D., Borowska-Fielding, J., Jones, C.T., and Zhang, Y. (2020). The Temporal Neurogenesis  
746 Patterning of Spinal p3–V3 Interneurons into Divergent Subpopulation Assemblies. *J. Neurosci.* 40, 1440–1452.
- 747 Dias, J.M., Alekseenko, Z., Applequist, J.M., and Ericson, J. (2014). Tgf $\beta$  signaling regulates temporal  
748 neurogenesis and potency of neural stem cells in the CNS. *Neuron* 84, 927–939.
- 749 Dias, J.M., Alekseenko, Z., Jeggari, A., Boareto, M., Vollmer, J., Kozhevnikova, M., Wang, H., Matisse, M.P.,  
750 Alexeyenko, A., Iber, D., et al. (2020). A Shh/Gli-driven three-node timer motif controls temporal identity and fate  
751 of neural stem cells. *Sci. Adv.* 6, eaba8196.
- 752 Ding, B., Wang, W., Selvakumar, T., Xi, H.S., Zhu, H., Chow, C.W., Horton, J.D., Gronostajski, R.M., and  
753 Kilpatrick, D.L. (2013). Temporal regulation of nuclear factor one occupancy by calcineurin/NFAT governs a  
754 voltage-sensitive developmental switch in late maturing neurons. *J. Neurosci.* 33, 2860–2872.
- 755 Doe, C.Q. (2017). Temporal Patterning in the Drosophila CNS. *Annu. Rev. Cell Dev. Biol.* 33, 219–240.
- 756 Dubreuil, V., Barhanin, J., Goridis, C., and Brunet, J.F. (2009). Breathing with Phox2b. *Philos. Trans. R. Soc. B*  
757 *Biol. Sci.* 364, 2477–2483.
- 758 Dutta, D.J., Zameer, A., Mariani, J.N., Zhang, J., Asp, L., Huynh, J., Mahase, S., Laitman, B.M., Argaw, A.T.,  
759 Mitiku, N., et al. (2018). Erratum: Correction: Combinatorial actions of Tgf $\beta$  and Activin ligands promote  
760 oligodendrocyte development and CNS myelination (doi:10.1242/dev.106492) (*Development* (Cambridge,  
761 England) (2014) 141 12 (2414-2428) PII: dev168708). *Development* 145.
- 762 Erclik, T., Li, X., Courgeon, M., Bertet, C., Chen, Z., Baumert, R., Ng, J., Koo, C., Arain, U., Behnia, R., et al.  
763 (2017). Integration of temporal and spatial patterning generates neural diversity. *Nature* 541, 365–370.
- 764 Ewels, P.A., Peltzer, A., Fillinger, S., Patel, H., Alneberg, J., Wilm, A., Garcia, M.U., Di Tommaso, P., and  
765 Nahnsen, S. (2020). The nf-core framework for community-curated bioinformatics pipelines. *Nat. Biotechnol.* 38,  
766 276–278.
- 767 Fischer, I., Dulin, J.N., and Lane, M.A. (2020). Transplanting neural progenitor cells to restore connectivity after  
768 spinal cord injury. *Nat. Rev. Neurosci.* 21, 366–383.
- 769 Fornes, O., Castro-Mondragon, J.A., Khan, A., Van Der Lee, R., Zhang, X., Richmond, P.A., Modi, B.P.,  
770 Correard, S., Gheorghe, M., Baranašić, D., et al. (2020). JASPAR 2020: Update of the open-Access database of  
771 transcription factor binding profiles. *Nucleic Acids Res.* 48, D87–D92.
- 772 Fraser, J., Essebier, A., Brown, A.S., Davila, R.A., Harkins, D., Zalucki, O., Shapiro, L.P., Penzes, P.,  
773 Wainwright, B.J., Scott, M.P., et al. (2020). Common Regulatory Targets of NFIA, NFIX and NFIB during  
774 Postnatal Cerebellar Development. *Cerebellum* 19, 89–101.
- 775 Gabitto, M.I., Pakman, A., Bikoff, J.B., Abbott, L.F., Jessell, T.M., and Paninski, L. (2016). Bayesian Sparse  
776 Regression Analysis Documents the Diversity of Spinal Inhibitory Interneurons. *Cell* 165, 220–233.
- 777 Garcia-Campmany, L., and Marti, E. (2007). The TGFbeta intracellular effector Smad3 regulates neuronal  
778 differentiation and cell fate specification in the developing spinal cord. *Development* 134, 65–75.

- 779 Gouti, M., Tsakiridis, A., Wymeersch, F.J., Huang, Y., Kleinjung, J., Wilson, V., and Briscoe, J. (2014). In vitro  
780 generation of neuromesodermal progenitors reveals distinct roles for wnt signalling in the specification of spinal  
781 cord and paraxial mesoderm identity. *PLoS Biol* 12, e1001937.
- 782 Häring, M., Zeisel, A., Hochgerner, H., Rinwa, P., Jakobsson, J.E.T., Lönnerberg, P., La Manno, G., Sharma, N.,  
783 Borgius, L., Kiehn, O., et al. (2018). Neuronal atlas of the dorsal horn defines its architecture and links sensory  
784 input to transcriptional cell types. *Nat. Neurosci.* 21, 869–880.
- 785 Harris, A., Masgutova, G., Collin, A., Toch, M., Hidalgo-Figueroa, M., Jacob, B., Corcoran, L.M., Francius, C.,  
786 and Clotman, F. (2019). Onecut factors and Pou2f2 regulate the distribution of V2 interneurons in the mouse  
787 developing spinal cord. *Front. Cell. Neurosci.* 13.
- 788 Harris, L., Genovesi, L.A., Gronostajski, R.M., Wainwright, B.J., and Piper, M. (2015). Nuclear factor one  
789 transcription factors: Divergent functions in developmental versus adult stem cell populations. *Dev. Dyn.* 244,  
790 227–238.
- 791 Hayashi, M., Hinckley, C.A., Driscoll, S.P., Moore, N.J., Levine, A.J., Hilde, K.L., Sharma, K., and Pfaff, S.L.  
792 (2018). Graded Arrays of Spinal and Supraspinal V2a Interneuron Subtypes Underlie Forelimb and Hindlimb  
793 Motor Control. *Neuron* 1–16.
- 794 Hoang, P.T., Chalif, J.I., Bikoff, J.B., Jessell, T.M., Mentis, G.Z., and Wichterle, H. (2018). Subtype Diversification  
795 and Synaptic Specificity of Stem Cell-Derived Spinal Interneurons. *Neuron* 100, 135-149.e7.
- 796 Holguera, I., and Desplan, C. (2018). Neuronal specification in space and time. *Science* (80-. ). 362, 176–180.
- 797 Hollyday, M., and Hamburger, V. (1977). An autoradiographic study of the formation of the lateral motor column  
798 in the chick embryo. *Brain Res.* 132, 197–208.
- 799 Hu, H., Miao, Y.R., Jia, L.H., Yu, Q.Y., Zhang, Q., and Guo, A.Y. (2019). AnimalTFDB 3.0: A comprehensive  
800 resource for annotation and prediction of animal transcription factors. *Nucleic Acids Res.* 47, D33–D38.
- 801 Inman, G.J., Nicolás, F.J., Callahan, J.F., Harling, J.D., Gaster, L.M., Reith, A.D., Laping, N.J., and Hill, C.S.  
802 (2002). SB-431542 Is a Potent and Specific Inhibitor of Transforming Growth Factor- $\beta$  Superfamily Type I Activin  
803 Receptor-Like Kinase (ALK) Receptors ALK4, ALK5, and ALK7. *Mol. Pharmacol.* 62, 65 LP – 74.
- 804 Jabaudon, D. (2017). Fate and freedom in developing neocortical circuits. *Nat. Commun.* 8, 1–9.
- 805 Javed, A., Mattar, P., Lu, S., Kruczek, K., Kloc, M., Gonzalez-Cordero, A., Bremner, R., Ali, R.R., and Cayouette,  
806 M. (2020). Pou2f1 and Pou2f2 cooperate to control the timing of cone photoreceptor production in the developing  
807 mouse retina. *Development* 147, dev188730.
- 808 Jessell, T.M. (2000). Neuronal specification in the spinal cord: inductive signals and transcriptional codes. *Nat*  
809 *Rev Genet* 1, 20–29.
- 810 Kabayiza, K.U., Masgutova, G., Harris, A., Rucchin, V., Jacob, B., and Clotman, F. (2017). The Onecut  
811 Transcription Factors Regulate Differentiation and Distribution of Dorsal Interneurons during Spinal Cord  
812 Development. *Front. Mol. Neurosci.* 10, 1–17.
- 813 Kang, P., Lee, H.K., Glasgow, S.M., Finley, M., Donti, T., Gaber, Z.B., Graham, B.H., Foster, A.E., Novitch, B.G.,  
814 Gronostajski, R.M., et al. (2012). Sox9 and NFIA Coordinate a Transcriptional Regulatory Cascade during the  
815 Initiation of Gliogenesis. *Neuron* 74, 79–94.
- 816 Kicheva, A., Bollenbach, T., Ribeiro, A., Valle, H.P., Lovell-Badge, R., Episkopou, V., and Briscoe, J. (2014).  
817 Coordination of progenitor specification and growth in mouse and chick spinal cord. *Science* 345, 1254927.
- 818 Kim, J., Wu, H.H., Lander, A.D., Lyons, K.M., Matzuk, M.M., and Calof, A.L. (2005). Developmental biology:

- 819 GDF11 controls the timing of progenitor cell competence in developing retina. *Science* (80-. ). 308, 1927–1930.
- 820 Kohwi, M., and Doe, C.Q. (2013). Temporal fate specification and neural progenitor competence during  
821 development. *Nat. Rev. Neurosci.* 14, 823–838.
- 822 Li, W., Sun, W., Zhang, Y., Wei, W., Ambasudhan, R., Xia, P., Talantova, M., Lin, T., Kim, J., Wang, X., et al.  
823 (2011). Rapid induction and long-term self-renewal of primitive neural precursors from human embryonic stem  
824 cells by small molecule inhibitors. *Proc. Natl. Acad. Sci. U. S. A.* 108, 8299–8304.
- 825 Li, X., Erclik, T., Bertet, C., Chen, Z., Voutev, R., Venkatesh, S., Morante, J., Celik, A., and Desplan, C. (2013).  
826 Temporal patterning of *Drosophila* medulla neuroblasts controls neural fates. *Nature* 498, 456–462.
- 827 Liu, L.Y., Long, X., Yang, C.P., Miyares, R.L., Sugino, K., Singer, R.H., and Lee, T. (2019). Mamo decodes  
828 hierarchical temporal gradients into terminal neuronal fate. *Elife* 8, 1–28.
- 829 Luxenhofer, G., Helmbrecht, M.S., Langhoff, J., Giusti, S.A., Refojo, D., and Huber, A.B. (2014). MicroRNA-9  
830 promotes the switch from early-born to late-born motor neuron populations by regulating *Onecut* transcription  
831 factor expression. *Dev. Biol.* 386, 358–370.
- 832 Ma, T.C., Vong, K.I., and Kwan, K.M. (2020). Spatiotemporal Decline of BMP Signaling Activity in Neural  
833 Progenitors Mediates Fate Transition and Safeguards Neurogenesis. *Cell Rep.* 30, 3616-3624.e4.
- 834 Manno, G. La, Siletti, K., Furlan, A., Gyllborg, D., Vinsland, E., Langseth, C.M., Khven, I., Johnsson, A., Nilsson,  
835 M., Lönnerberg, P., et al. (2020). Molecular architecture of the developing mouse brain. *BioRxiv*  
836 2020.07.02.184051.
- 837 Masgutova, G., Harris, A., Jacob, B., Corcoran, L.M., and Clotman, F. (2019). *Pou2f2* Regulates the Distribution  
838 of Dorsal Interneurons in the Mouse Developing Spinal Cord. *Front. Mol. Neurosci.* 12, 1–19.
- 839 Matuzelski, E., Bunt, J., Harkins, D., Lim, J.W.C., Gronostajski, R.M., Richards, L.J., Harris, L., and Piper, M.  
840 (2017). Transcriptional regulation of *Nfix* by *NFIB* drives astrocytic maturation within the developing spinal cord.  
841 *Dev. Biol.* 432, 286–297.
- 842 Mazzoni, E.O., Mahony, S., Closser, M., Morrison, C. a, Nedelec, S., Williams, D.J., An, D., Gifford, D.K., and  
843 Wichterle, H. (2013). Synergistic binding of transcription factors to cell-specific enhancers programs motor  
844 neuron identity. *Nat. Neurosci.* 16, 1219–1227.
- 845 Metzis, V., Steinhäuser, S., Pakanavicius, E., Gouti, M., Stamatakis, D., Ivanovitch, K., Watson, T., Rayon, T.,  
846 Mousavy Gharavy, S.N., Lovell-Badge, R., et al. (2018). Nervous System Regionalization Entails Axial Allocation  
847 before Neural Differentiation. *Cell* 175, 1105-1118.e17.
- 848 Miller, F.D., and Gauthier, A.S. (2007). Timing Is Everything: Making Neurons versus Glia in the Developing  
849 Cortex. *Neuron* 54, 357–369.
- 850 Müller, T., Brohmann, H., Pierani, A., Heppenstall, P.A., Lewin, G.R., Jessell, T.M., and Birchmeier, C. (2002).  
851 The homeodomain factor *Lbx1* distinguishes two major programs of neuronal differentiation in the dorsal spinal  
852 cord. *Neuron* 34, 551–562.
- 853 Namihira, M., Kohyama, J., Semi, K., Sanosaka, T., Deneen, B., Taga, T., and Nakashima, K. (2009). Committed  
854 Neuronal Precursors Confer Astrocytic Potential on Residual Neural Precursor Cells. *Dev. Cell* 16, 245–255.
- 855 Niederreither, K., McCaffery, P., Dräger, U.C., Chambon, P., and Dollé, P. (1997). Restricted expression and  
856 retinoic acid-induced downregulation of the retinaldehyde dehydrogenase type 2 (*RALDH-2*) gene during mouse  
857 development. *Mech. Dev.* 62, 67–78.
- 858 Novitsch, B.G., Chen, A.I., and Jessell, T.M. (2001). Coordinate regulation of motor neuron subtype identity and

- 859 pan-neuronal properties by the bHLH repressor Olig2. *Neuron* 31, 773–789.
- 860 Oberst, P., Agirman, G., and Jabaudon, D. (2019). Principles of progenitor temporal patterning in the developing  
861 invertebrate and vertebrate nervous system. *Curr. Opin. Neurobiol.* 56, 185–193.
- 862 Parsons, M.J., Brancaccio, M., Sethi, S., Maywood, E.S., Satija, R., Edwards, J.K., Jagannath, A., Couch, Y.,  
863 Finelli, M.J., Smyllie, N.J., et al. (2015). The Regulatory Factor ZFH3 Modifies Circadian Function in SCN via an  
864 at Motif-Driven Axis. *Cell* 162, 607–621.
- 865 Pattyn, A., Vallstedt, A., Dias, J.M., Samad, O.A., Krumlauf, R., Rijli, F.M., Brunet, J.F., and Ericson, J. (2003).  
866 Coordinated temporal and spatial control of motor neuron and serotonergic neuron generation from a common  
867 pool of CNS progenitors. *Genes Dev.* 17, 729–737.
- 868 Paul Oh, S., Yeo, C.Y., Lee, Y., Schrewe, H., Whitman, M., and Li, E. (2002). Activin type IIA and IIB receptors  
869 mediate Gdf11 signaling in axial vertebral patterning. *Genes Dev.* 16, 2749–2754.
- 870 Philippidou, P., and Dasen, J.S. (2013). Hox Genes: Choreographers in Neural Development, Architects of  
871 Circuit Organization. *Neuron* 80, 12–34.
- 872 Piper, M., Barry, G., Hawkins, J., Mason, S., Lindwall, C., Little, E., Sarkar, A., Smith, A.G., Moldrich, R.X., Boyle,  
873 G.M., et al. (2010). NFIA controls telencephalic progenitor cell differentiation through repression of the Notch  
874 effector Hes1. *J. Neurosci.* 30, 9127–9139.
- 875 Plachez, C., Lindwall, C., Sunn, N., Piper, M., Moldrich, R.X., Campbell, C.E., Osinski, J.M., Gronostajski, R.M.,  
876 and Richards, L.J. (2008). Nuclear Factor I gene expression in the developing forebrain. *J. Comp. Neurol.* 508,  
877 385–401.
- 878 Ran, F.A., Hsu, P.D., Wright, J., Agarwala, V., Scott, D.A., and Zhang, F. (2013). Genome engineering using the  
879 CRISPR-Cas9 system. *Nat Protoc* 8, 2281–2308.
- 880 Rayon, T., Stamatakis, D., Perez-Carrasco, R., Garcia-Perez, L., Barrington, C., Melchionda, M., Exelby, K.,  
881 Lazaro, J., Tybulewicz, V.L.J., Fisher, E.M.C., et al. (2020). Species-specific pace of development is associated  
882 with differences in protein stability. *Science* (80-. ). 369, eaba7667.
- 883 Rossi, A.M., and Desplan, C. (2020). Extrinsic activin signaling cooperates with an intrinsic temporal program to  
884 increase mushroom body neuronal diversity. *Elife* 9, 1–23.
- 885 Rowitch, D.H., and Kriegstein, A.R. (2010). Developmental genetics of vertebrate glial-cell specification. *Nature*  
886 468, 214–222.
- 887 Roy, A., Francius, C., Rousso, D.L., Seuntjens, E., Debruyne, J., Luxenhofer, G., Huber, a. B., Huylebroeck, D.,  
888 Novitsch, B.G., and Clotman, F. (2012). Onecut transcription factors act upstream of Isl1 to regulate spinal  
889 motoneuron diversification. *Development* 139, 3109–3119.
- 890 Sagner, A., and Briscoe, J. (2019). Establishing neuronal diversity in the spinal cord: a time and a place.  
891 *Development* 146, dev182154.
- 892 Sagner, A., Gaber, Z.B., Delile, J., Kong, J.H., Rousso, D.L., Pearson, C.A., Weicksel, S.E., Melchionda, M.,  
893 Mousavy Gharavy, S.N., Briscoe, J., et al. (2018). Olig2 and Hes regulatory dynamics during motor neuron  
894 differentiation revealed by single cell transcriptomics. *PLOS Biol.* 16, e2003127.
- 895 Sances, S., Bruijn, L.I., Chandran, S., Eggan, K., Ho, R., Klim, J.R., Livesey, M.R., Lowry, E., Macklis, J.D.,  
896 Rushton, D., et al. (2016). Modeling ALS with motor neurons derived from human induced pluripotent stem cells.  
897 *Nat. Neurosci.* 16, 542–553.
- 898 Sapkota, D., Chintala, H., Wu, F., Fliesler, S.J., Hu, Z., and Mu, X. (2014). OneCut1 and OneCut2 redundantly



- 899 regulate early retinal cell fates during development. *Proc. Natl. Acad. Sci.* *111*, E4086–E4095.
- 900 Sathyamurthy, A., Johnson, K.R., Matson, K.J.E., Dobrott, C.I., Li, L., Ryba, A.R., Bergman, T.B., Kelly, M.C.,  
901 Kelley, M.W., and Levine, A.J. (2018). Massively Parallel Single Nucleus Transcriptional Profiling Defines Spinal  
902 Cord Neurons and Their Activity during Behavior. *Cell Rep.* *22*, 2094–2106.
- 903 Scott, C.E., Wynn, S.L., Sesay, A., Cruz, C., Cheung, M., Gavira, M.V.G., Booth, S., Gao, B., Cheah, K.S.E.,  
904 Lovell-Badge, R., et al. (2010). SOX9 induces and maintains neural stem cells. *Nat. Neurosci.* *13*, 1181–1189.
- 905 Shi, Y., and Liu, J.-P. (2011). Gdf11 facilitates temporal progression of neurogenesis in the developing spinal  
906 cord. *J. Neurosci.* *31*, 883–893.
- 907 Sockanathan, S., and Jessell, T.M. (1998). Motor Neuron–Derived Retinoid Signaling Specifies the Subtype  
908 Identity of Spinal Motor Neurons. *Cell* *94*, 503–514.
- 909 Stam, F.J., Hendricks, T.J., Zhang, J., Geiman, E.J., Francius, C., Labosky, P.A., Clotman, F., and Goulding, M.  
910 (2012). Renshaw cell interneuron specialization is controlled by a temporally restricted transcription factor  
911 program. *Development* *139*, 179–190.
- 912 Stolt, C.C., Lommes, P., Sock, E., Chaboissier, M.-C.C., Schedl, A., and Wegner, M. (2003). The Sox9  
913 transcription factor determines glial fate choice in the developing spinal cord. *Genes Dev.* *17*, 1677–1689.
- 914 Stuart, T., Butler, A., Hoffman, P., Hafemeister, C., Papalexi, E., Mauck, W.M., Hao, Y., Stoeckius, M., Smibert,  
915 P., and Satija, R. (2019). Comprehensive Integration of Single-Cell Data. *Cell* *177*, 1888-1902.e21.
- 916 Tao, Y., and Zhang, S.C. (2016). Neural Subtype Specification from Human Pluripotent Stem Cells. *Cell Stem*  
917 *Cell* *19*, 573–586.
- 918 Tchieu, J., Calder, E.L., Guttikonda, S.R., Gutzwiller, E.M., Aromolaran, K.A., Steinbeck, J.A., Goldstein, P.A.,  
919 and Studer, L. (2019). NFIA is a gliogenic switch enabling rapid derivation of functional human astrocytes from  
920 pluripotent stem cells. *Nat. Biotechnol.* *37*, 267–275.
- 921 Telley, L., Agirman, G., Prados, J., Amberg, N., Fièvre, S., Oberst, P., Bartolini, G., Vitali, I., Cadilhac, C.,  
922 Hippenmeyer, S., et al. (2019). Temporal patterning of apical progenitors and their daughter neurons in the  
923 developing neocortex. *Science* (80- ). *364*.
- 924 Tiklová, K., Björklund, Å.K., Lahti, L., Fiorenzano, A., Nolbrant, S., Gillberg, L., Volakakis, N., Yokota, C.,  
925 Hilscher, M.M., Hauling, T., et al. (2019). Single-cell RNA sequencing reveals midbrain dopamine neuron  
926 diversity emerging during mouse brain development. *Nat. Commun.* *10*, 1–12.
- 927 Tripodi, M., Stepien, A.E., and Arber, S. (2011). Motor antagonism exposed by spatial segregation and timing of  
928 neurogenesis. *Nature* *479*, 61–66.
- 929 Vartanian, T., Fischbach, G., and Miller, R. (1999). Failure of spinal cord oligodendrocyte development in mice  
930 lacking neuregulin. *Proc. Natl. Acad. Sci. U. S. A.* *96*, 731–735.
- 931 Wang, W., Crandall, J.E., Litwack, E.D., Gronostajski, R.M., and Kilpatrick, D.L. (2010). Targets of the nuclear  
932 factor I regulon involved in early and late development of postmitotic cerebellar granule neurons. *J. Neurosci.*  
933 *Res.* *88*, 258–265.
- 934 Wickham, H. (2016). *ggplot2: Elegant Graphics for Data Analysis* (Springer-Verlag New York).
- 935 Wildner, H., Müller, T., Cho, S.-H., Bröhl, D., Cepko, C.L., Guillemot, F., and Birchmeier, C. (2006). dILA neurons  
936 in the dorsal spinal cord are the product of terminal and non-terminal asymmetric progenitor cell divisions, and  
937 require Mash1 for their development. *Development* *133*, 2105–2113.
- 938 Zeisel, A., Hochgerner, H., Lönnerberg, P., Johnsson, A., Memic, F., van der Zwan, J., Häring, M., Braun, E.,

- 939 Borm, L.E., La Manno, G., et al. (2018). Molecular Architecture of the Mouse Nervous System. *Cell* 174, 999-  
940 1014.e22.
- 941 Zeng, H., and Sanes, J.R. (2017). Neuronal cell-type classification: Challenges, opportunities and the path  
942 forward. *Nat. Rev. Neurosci.* 18, 530–546.
- 943
- 944

945 **Figure legends**

946 **Figure 1: Distinct birth-dates of neurons expressing different temporal TFs (see also**  
947 **Figures S1 and S2)**

- 948 (A) Distinct cohorts of TFs are induced at different developmental stages in neurons from  
949 all dorsal-ventral domains in the spinal cord  
950 (B) Scheme depicting EdU-birthdating of neurons.  
951 (C) Dams were injected with EdU at e9.5, e10.5, e11.5 or e12.5 and embryos collected at  
952 e13.5. Colocalization between EdU and temporal TFs was then assessed in spinal cord  
953 cryosections.  
954 (D) Zfhx3-positive neurons are labelled by EdU, when EdU is administered at e9.5, but not  
955 at e12.5.  
956 (E) EdU labels Nfib-positive neurons when administered at e12.5, but not at e9.5.  
957 (F) Neurod2-positive neurons are labelled when EdU is administered at e11.5, but not when  
958 EdU is administered at e9.5.  
959 (G) Percentage of EdU-positive neurons labelled by Zfhx3, Nfib and Neurod2 in the spinal  
960 cord.  
961 Scale bars in D,E,F = 200  $\mu$ m

962 **Figure 2: The temporal TF code is conserved at different rostral-caudal levels of the**  
963 **nervous system (see also Figure S3)**

- 964 (A) Expression of temporal TFs in scRNAseq data (Manno et al., 2020) from the developing  
965 forebrain, midbrain and hindbrain suggests conservation of temporal patterning in these  
966 parts of the nervous system.  
967 (B-D) Conservation of temporal patterning in the hindbrain.  
968 (B) Onecut2, but not Pou2f2 is expressed in hindbrain neurons at e9.5, while both TFs label  
969 distinct populations of neurons at e10.5.  
970 (C) Zfhx3, but not Nfib labels neurons at e11.5. These TFs label distinct populations of  
971 neurons at e13.5.  
972 (D) Zfhx3 and Nfib label distinct subsets of Phox2b-positive neurons in the hindbrain at  
973 e13.5.  
974 (E-H) Conservation of temporal patterning in the midbrain. (F,H) show higher magnification  
975 images of the regions outlined in (E,G) respectively.  
976 (E,F) Onecut2, but not Pou2f2, labels neurons in the midbrain at e10.5. Both TFs label distinct  
977 subsets of neurons at e11.5.  
978 (G,H) Zfhx3 labels neurons at e11.5, while Nfib expression is restricted to neural progenitors.  
979 At e13.5 Zfhx3 and Nfib label distinct subsets of neurons in the midbrain at e13.5.  
980 Scale bars = 100  $\mu$ m (B), 200  $\mu$ m (C,E,G) or 25  $\mu$ m (D, F, H)

981 **Figure 3: Midbrain dopaminergic neurons are a temporal population of neurons derived**  
982 **from the midbrain floor plate**

- 983 (A) Coexpression of Zfhx3 and Lmx1b in neurons derived from the midbrain floor plate at  
984 e11.5  
985 (B) Nfib is restricted to Sox2+ neural progenitors in the ventral midbrain at e11.5  
986 (C) Mutually exclusive expression of Zfhx3 and Nfib in Lmx1b-positive neurons at e13.5  
987 (D) Nfib labels Lmx1b-positive neurons directly adjacent to Sox2-positive progenitors at  
988 e13.5

- 989 (E) Colocalization between Zfhx3 and Zfhx4 in Lmx1b-positive neurons at e13.5  
990 (F) Zfhx4 labels Lmx1b-positive neurons expressing high-levels of TH at e13.5  
991 Scale bars = 100  $\mu$ m

992 **Figure 4: Conservation of the temporal TF code in stem-cell derived neurons with**  
993 **different axial and dorsal-ventral identities (see also Figure S4)**

- 994 (A) Schematics of the differentiation protocols for the generation of progenitors and neurons  
995 with different axial and dorsal-ventral identities  
996 (B) Flow cytometry analysis of temporal TF expression indicates that neurons with different  
997 axial and dorsal-ventral identities display the same temporal progression in-vitro as in-  
998 vivo.  
999 (C) Flow cytometry analysis of Nkx2.2 and Pax3 expression in neural progenitors in dorsal  
1000 and ventral spinal cord differentiations.  
1001 (D) Percentage of neural progenitors expressing Pax3 and Nkx2.2 in ventral and dorsal  
1002 spinal cord differentiations between days 7-11.

1003 **Figure 5: Conserved temporal patterning of neural progenitors throughout the**  
1004 **developing central nervous system (see also Figure S5)**

- 1005 (A) Differential gene expression analysis using scRNAseq from spinal cord neural  
1006 progenitors (Delile et al., 2019) identifies 542 genes (left) including 33 TFs (right) that  
1007 are differentially expressed during the neurogenic period. Heatmap shows log-scaled  
1008 and z-scored gene expression values for each gene.  
1009 (B) Characterization of the expression dynamics of the same 33 TFs in scRNAseq from the  
1010 developing forebrain, midbrain and hindbrain (Manno et al., 2020).  
1011 (C) Expression dynamics of the 542 genes (left) and 33 TFs (right) in RNAseq data from  
1012 ventral spinal cord differentiations (Rayon et al., 2020). Heatmap shows log-scaled and  
1013 z-scored gene expression values for each gene. Order of the genes in both heatmaps  
1014 is the same as in (A).  
1015 (D) RT-qPCR analysis of *Lin28a*, *Nr6a1* and *Nfia* from days 5-11 in in-vitro differentiations  
1016 with different axial identities reveals conserved expression dynamics of these markers  
1017 in the in-vitro differentiations. See Figure S5B for quantification of further markers.  
1018 (E) Quantification of *Nfia* induction in in-vitro generated neural progenitors with different  
1019 axial identities by flow cytometry.  
1020 (F) Conserved temporal patterning of neural progenitors throughout the developing nervous  
1021 system. Early neural progenitors express markers such as *Lin28a*, *Lin28b*, *Nr6a1*,  
1022 *Hmga1*, *Hmga2* and *Dnajc2* (orange), while late progenitors are characterized by the  
1023 expression of *Nfia*, *Nfib*, *Npas3*, *Thra*, *Tcf4* and *Zbtb20* (light blue).

1024 **Figure 6: TGF $\beta$  signalling influences the timing of temporal TF expression in neurons**  
1025 **and progenitors**

- 1026 (A) Schematics of the differentiation protocols for TGF $\beta$  pathway inhibition in dorsal and  
1027 ventral spinal cord conditions  
1028 (B) Inhibition of TGF $\beta$  signalling in dorsal spinal cord conditions causes down-regulation of  
1029 the TGF $\beta$  pathway target gene *Smad7*.  
1030 (C) TGF $\beta$  pathway inhibition does not alter the proportion of progenitors expressing Pax3 in  
1031 dorsal (left) or Nkx2.2 in ventral (right) conditions.  
1032 (D) Inhibition of TGF $\beta$  signalling delays the induction of *Nfia* in dorsal and ventral spinal cord  
1033 neural progenitors.

- 1034 (E) Percentage of neurons expressing the different temporal TFs in the presence and  
1035 absence of TGF $\beta$  pathway inhibition. TGF $\beta$  pathway inhibition causes a delay in the  
1036 induction of the late neuronal markers *Zfhx3*, *Nfia* and *Neurod2* in neurons.  
1037 (F) Scheme outlining the differentiation protocol to assess the role of TGF $\beta$  pathway  
1038 activation and inhibition on the temporal patterning of neural progenitors.  
1039 (G) TGF $\beta$  pathway activation causes an earlier induction of the late markers *Sox9*, *Nfia*, *Nfib*  
1040 and *Nfix* and earlier downregulation of *Lin28a* and *Lin28b* by RT-qPCR.  
1041 (H) TGF $\beta$  pathway inhibition has the opposite effect on the expression of these markers.

1042 **Figure 7: Nfia and Nfib are required for the efficient generation of late-born Neurod2**  
1043 **neurons (see also Figure S6)**

- 1044 (A) Analysis of the *Neurod2* locus using JASPAR (Fornes et al., 2020) identifies multiple Nfi  
1045 transcription factor binding motifs (top). Analysis of *Nfia*, *Nfib* and *Nfix* ChIP-Seq data  
1046 from the mouse cerebellum (Fraser et al., 2020) confirms binding of all three TFs to  
1047 these motifs (bottom).  
1048 (B,C) *Neurod2* intensity histograms in control (B) and *Nfia*; *Nfib* double mutant (C) neurons at  
1049 D11 in ventral conditions. Dashed lines indicate the applied thresholds above which  
1050 neurons were counted as *Neurod2* positive.  
1051 (D) Quantification of the percentage of *Neurod2*-positive neurons at D11 in control and *Nfia*;  
1052 *Nfib* double mutants differentiated in ventral conditions reveals a strong reduction of  
1053 *Neurod2* neurons in the absence of *Nfia* and *Nfib*. (n=6 for control and n=3 for *Nfia*; *Nfib*  
1054 double mutants). Significance was assessed by unpaired t-test with Welch's correction.  
1055

## 1056 Supplemental Figure legends

### 1057 Figure S1. Related to Figure 1: Complete time course of colocalization between 1058 temporal TFs and EdU administered at different timepoints

1059 (A-C) Colocalization between Zfhx3 (A), Nfib (B), Neurod2 (C) and EdU administered at e9.5,  
1060 e10.5, e11.5 or e12.5 (from left to right) in e13.5 spinal cord sections.  
1061 Scale bars in overview pictures = 200  $\mu$ m, insets = 50  $\mu$ m

### 1062 Figure S2. Related to Figure 1: Non-overlapping expression of temporal TFs in spinal 1063 cord neurons at e13.5

1064 (A-B) Zfhx3 and Nfib (A) or Zfhx3 and Neurod2 (B) are expressed in mutually exclusive  
1065 populations of neurons in the spinal cord.  
1066 Scale bars in overview pictures = 200  $\mu$ m, insets = 20  $\mu$ m

### 1067 Figure S3. Related to Figure 2: Characterization of temporal TF expression in the 1068 developing retina

1069 (A) UMAP representation of scRNAseq data from the developing mouse retina (Clark et al.,  
1070 2019) color-coded by developmental stage.  
1071 (B) Same UMAP-representation as (A) color-coded for cell identity (AC amacrine cells, HC  
1072 horizontal cells, RGCs retinal ganglion cells, RPCs retinal progenitor cells, NCs  
1073 neurogenic cells, PPs photoreceptor precursors)  
1074 (C) Expression levels of Onecut2, Pou2f2, Zfhx3, and Nfib in individual cells  
1075 (D) Heatmap indicating expression levels of the temporal TFs (Onecut2, Pou2f2, Zfhx3, and  
1076 Nfib) and known marker genes (Lhx1, Pax6, Pou4f2, Thrb and Nr1) in different types of  
1077 retinal neurons stratified by developmental age.

### 1078 Figure S4. Related to Figure 4: Further characterization of the in-vitro differentiations

1079 (A) RT-qPCR analysis of *Foxg1*, *Otx2*, *Hoxa4*, *Hoxb9* and *Hoxc8* reveals the generation of  
1080 neurons and progenitors with different axial identities in the in-vitro differentiations  
1081 (B) Gating strategy for the quantification of the expression of different markers in neurons  
1082 and progenitors by flow cytometry. Living cells were identified based on Infrared  
1083 Life/Dead stain. Gating on single cells was achieved using forward and side-scatter as  
1084 indicated. Progenitors and neurons were discriminated based on the progenitor marker  
1085 Sox2 and neuronal beta-tubulin (Tubb3). To quantify the proportion of neurons  
1086 expressing Onecut2, Zfhx3 and Neurod2 an intensity threshold was applied to each  
1087 sample that was exceeded by 1-2% of progenitors. The same threshold was then  
1088 applied to neurons in the same sample and the percentage of neurons exceeding this  
1089 threshold was counted as positive. As Nfia is expressed in neurons and progenitors, a  
1090 global threshold was applied to quantify the proportion of neurons and progenitors  
1091 expressing Nfia.  
1092 (C) Characterization of dorsal and ventral spinal cord differentiations by immunostaining.  
1093 Under dorsal conditions most neurons express the TF Lbx1, which is expressed in dl4-  
1094 dl6 neurons generated in the intermediate dorsal part of the spinal cord. Under ventral  
1095 conditions neurons express the V3 interneuron marker Sim1.  
1096 Scale bars in C = 25  $\mu$ m  
1097



1098 **Figure S5. Related to Figure 5: Temporal patterning of neurons and progenitors**

- 1099 (A) Spatial and temporal expression of the 33 differentially expressed TFs during the  
1100 neurogenic period in spinal cord neural progenitors  
1101 (B) RT-qPCR analysis for *Lin28b*, *Sox9*, *Npas3*, *Zbtb20*, *Nfib* and *Hopx* from days 5-11 in  
1102 in-vitro generated differentiations with different axial identities reveals that temporal  
1103 patterning is conserved in-vitro.

1104 **Figure S6. Related to Figure 7: Characterization of the *Nfia*; *Nfib* double mutant ES cell**  
1105 **line**

- 1106 (A,B) Engineering of a *Nfia*; *Nfib* double mutant ES cell line by CRISPR/Cas9-mediated  
1107 mutagenesis. Introduction of double heterozygous frameshift mutations in both genes  
1108 was validated by Sanger sequencing.  
1109 (C,D) Loss of *Nfia* (C) and *Nfib* (D) immunostaining in neural progenitors generated from *Nfia*;  
1110 *Nfib* double mutant ES cells in dorsal differentiations at D10  
1111 Scale bars in C,D = 20  $\mu$ m  
1112

1113 **Supplemental Figure legends**

1114 **Table S1. Related to Experimental Procedures: List of antibodies used for**  
 1115 **immunofluorescence**

| Antibody | Species    | Company                                  | Catalogue number   | Dilution |
|----------|------------|------------------------------------------|--------------------|----------|
| HuC      | mouse      | Molecular Probes                         | clone 16A11        | 1:250    |
| Lbx1     | guinea-pig | from Thomas Müller and Carmen Birchmeier | Müller et al. 2002 | 1:10000  |
| Lmx1b    | guinea-pig | from Thomas Müller and Carmen Birchmeier | Müller et al. 2002 | 1:10000  |
| Neurod2  | rabbit     | Abcam                                    | ab104430           | 1:1000   |
| Nfia     | rabbit     | Atlas Antibodies                         | HPA008884          | 1:1000   |
| Nfib     | rabbit     | Abcam                                    | ab186738           | 1:100    |
| Onecut2  | sheep      | R&D                                      | AF6294             | 1:500    |
| Pou2f2   | rabbit     | Abcam                                    | ab178679           | 1:1000   |
| Sim1     | rabbit     | Aviva SysBio                             | ARP33296_P050      | 1:50     |
| Sox2     | mouse      | Santa Cruz Biotechnology                 | sc-365823          | 1:200    |
| Sox2     | goat       | R&D                                      | AF2018             | 1:500    |
| TH       | sheep      | R&D                                      | AF7566             | 1:1000   |
| Zfhx3    | sheep      | R&D                                      | AF7384             | 1:1000   |
| Zfhx4    | rabbit     | Atlas Antibodies                         | HPA023837          | 1:1000   |

1116  
1117

1118 **Table S2. Related to Experimental Procedures: List of antibodies for flow cytometry**

| Antibody   | Species | Company          | Catalogue number | Dilution | secondary antibody                          |
|------------|---------|------------------|------------------|----------|---------------------------------------------|
| Neurod2    | rabbit  | Abcam            | ab104430         | 1:1000   | donkey-anti-rabbit A488 (Life Technologies) |
| Nfia       | rabbit  | Atlas Antibodies | HPA008884        | 1:1000   | donkey-anti-rabbit A488 (Life Technologies) |
| Nkx2.2-PE  | mouse   | BD Biosciences   | 564729           | 1:50     | N/A                                         |
| Onecut2    | sheep   | R&D              | AF6294           | 1:500    | donkey-anti-sheep A568 (Life Technologies)  |
| Pax3-APC   | mouse   | R&D              | IC2457A          | 1:50     | N/A                                         |
| Sox2-V450  | mouse   | BD Biosciences   | 561610           | 1:100    | N/A                                         |
| Tubb3:A488 | mouse   | BD Biosciences   | 560381           | 1:100    | N/A                                         |
| Tubb3:A647 | mouse   | BD Biosciences   | 560394           | 1:100    | N/A                                         |
| Zxh3       | sheep   | R&D              | AF7384           | 1:500    | donkey-anti-sheep A568 (Life Technologies)  |

1119

1120 **Table S3. Related to Figures 4,5,6,7: Summary of flow cytometry results** (Provided as  
 1121 separate Excel file)  
 1122

1123 **Table S4. Related to Experimental Procedures: List of primers for RT-qPCR analysis**  
 1124

| Gene                              | Forward               | Reverse                  |
|-----------------------------------|-----------------------|--------------------------|
| <i>Foxg1</i>                      | GCTGGACATGGGAGATAGGA  | GGTGGTATGATGATGGTGA      |
| <i>Hopx</i>                       | CCATCCTTAGTCAGACGCGCA | GGGTGCTTGTGACCTTGTT      |
| <i>Hoxa4</i>                      | CGGTGGTGTACCCCTGGAT   | GCTTAGGTTGCGCTCCGTTAT    |
| <i>Hoxb9</i>                      | TAATCAAAGAGCTGGCTACG  | CCCTGGTGAGGTACATATTG     |
| <i>Hoxc8</i>                      | GAAGGACAAGGCCACTTAAAT | AGGTCTGATACCGGCTGTAAGTTT |
| <i>Lin28a</i> (Peng et al. 2011)  | ACCAGCTCGCAGACCTACAT  | CAGACCCTTGGCTGACTTCT     |
| <i>Lin28b</i>                     | AAGGCCTTGAGTCAATACGGG | TGCCGTCTCCACCTATCTCC     |
| <i>Nfia</i>                       | AAGCCTCCAACCATCAAC    | TTTACAAAGCTTGGATCCCG     |
| <i>Nfib</i>                       | GCTGAGTTGGGAGATTGTGTC | TTCTGCTTGATTTCCGGCTTC    |
| <i>Nfix</i>                       | AGCCACATCACATTGGAGTC  | CATCTCCTTGCTGGTTTGA      |
| <i>Npas3</i>                      | CCCTCCACCAAAACCTCAG   | GCCATCCAGGGACTGCAAAA     |
| <i>Nr6a1</i>                      | GGAGACATGGGAAGTTTCCGT | TCACGACTGCACCGATACAC     |
| <i>Otx2</i>                       | CAGTCGCCACCTCTACTTTG  | TGGTGGGTAGATTTGGAGTG     |
| <i>Smad7</i>                      | TTCGACAACAAGAGTCAGC   | GGTAACTGCTGCGGTTGTAA     |
| <i>Sox9</i>                       | AGGAAGCTGGCAGACCAGT   | CGAAGGGTCTCTTCTCGCT      |
| <i>Zbtb20</i> (Nagao et al. 2016) | AACGCAATGAATCCGAGGAGT | CCCAAAGTGTGCTCCACTGA     |
| <i>β-Actin</i>                    | TGGCTCCTAGCACCATGA    | CCACCGATCCACACAGAG       |

1125

# Figure 1 Sagner et al.

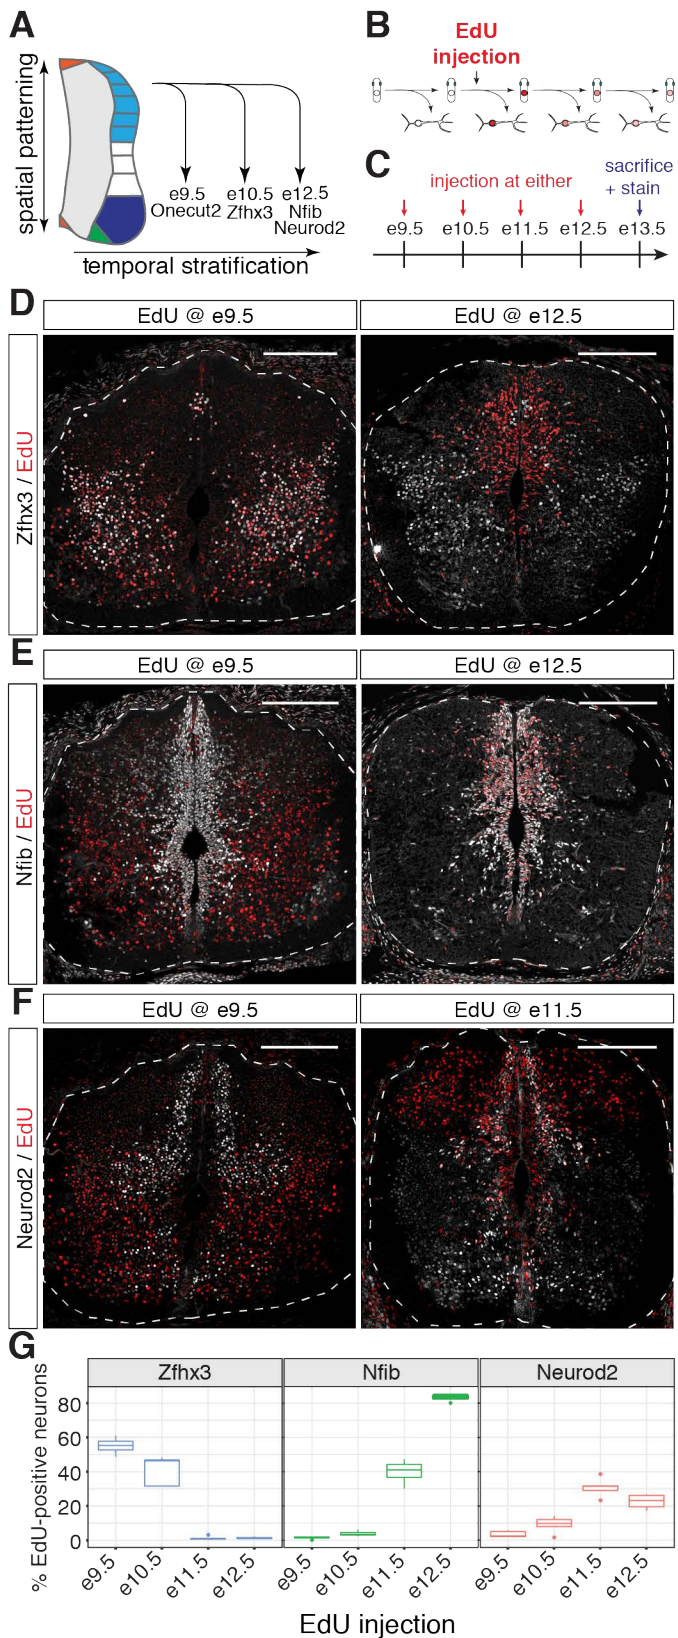



Figure 2 Sagner et al.

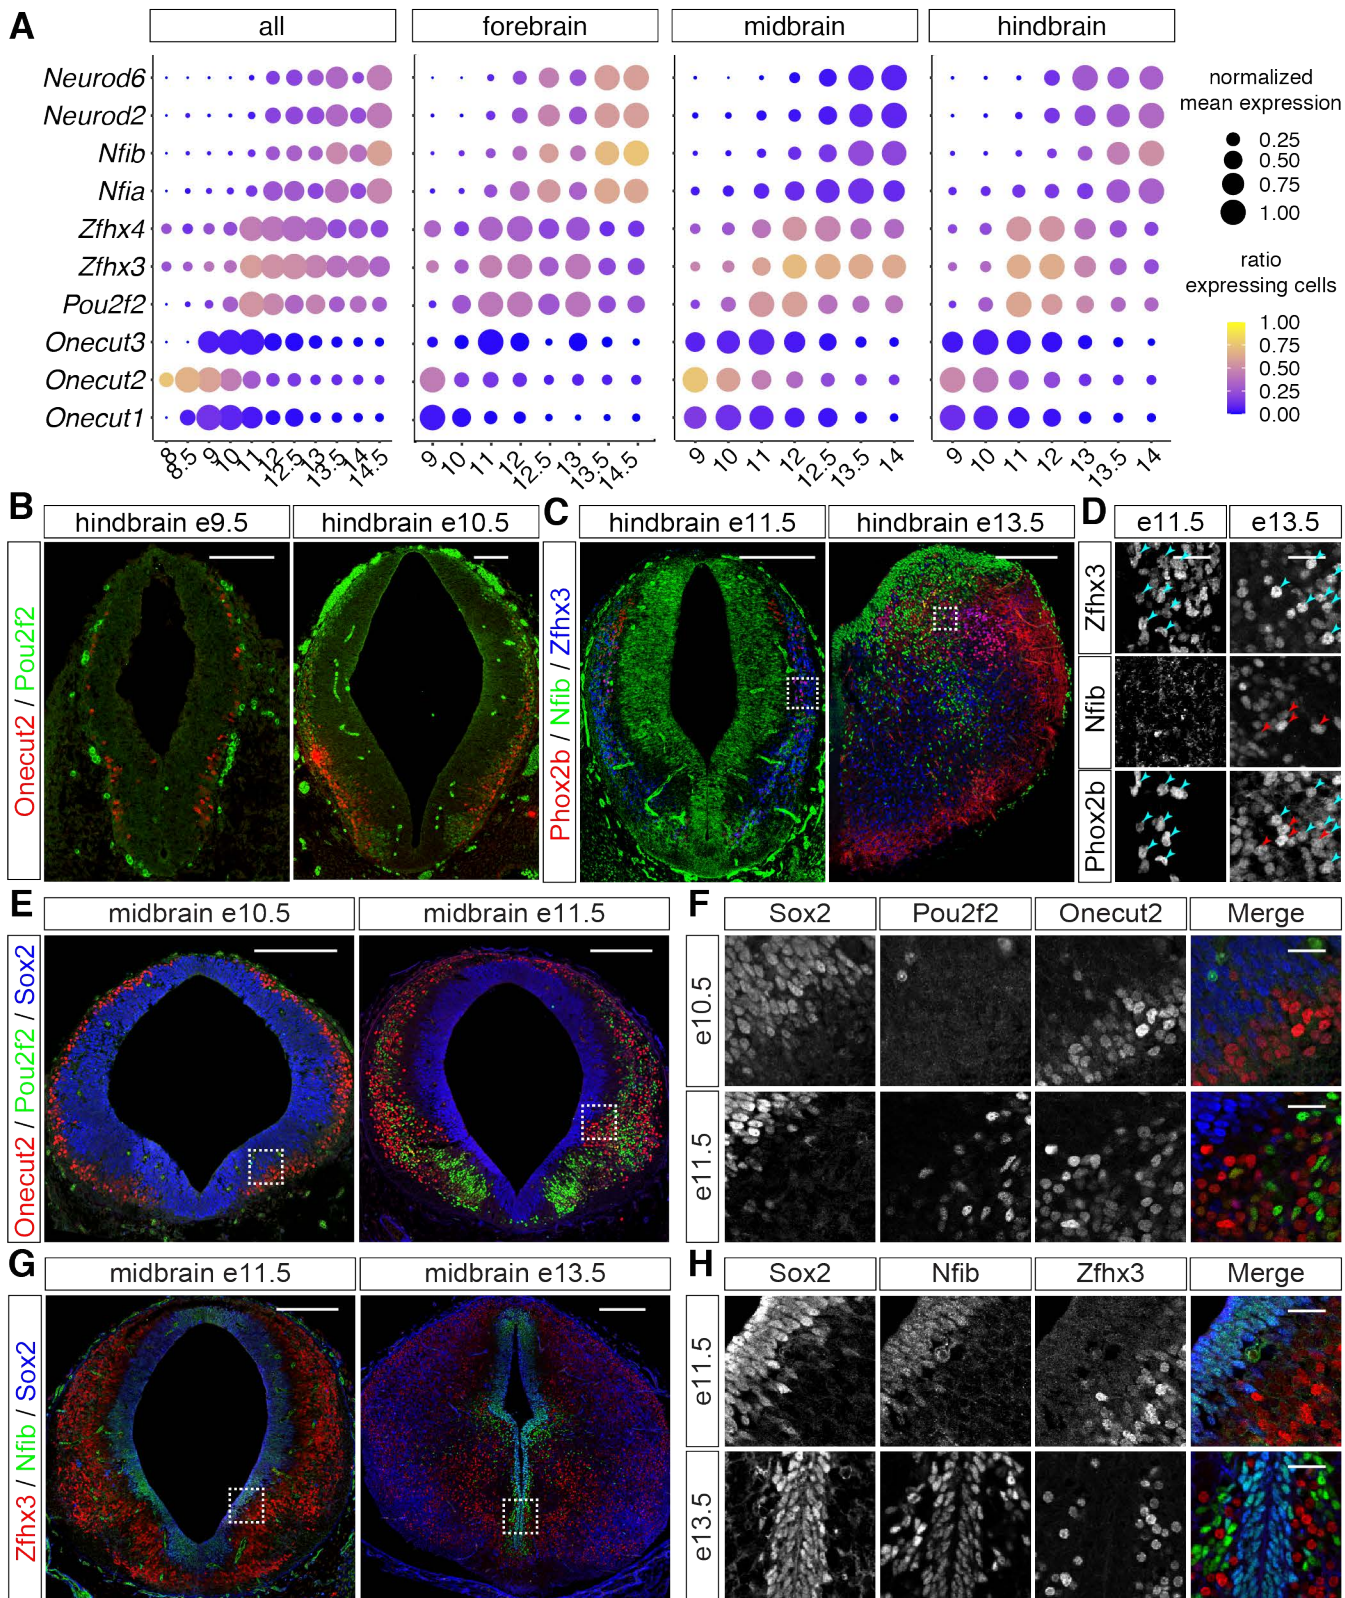



Figure 3 Sagner et al.

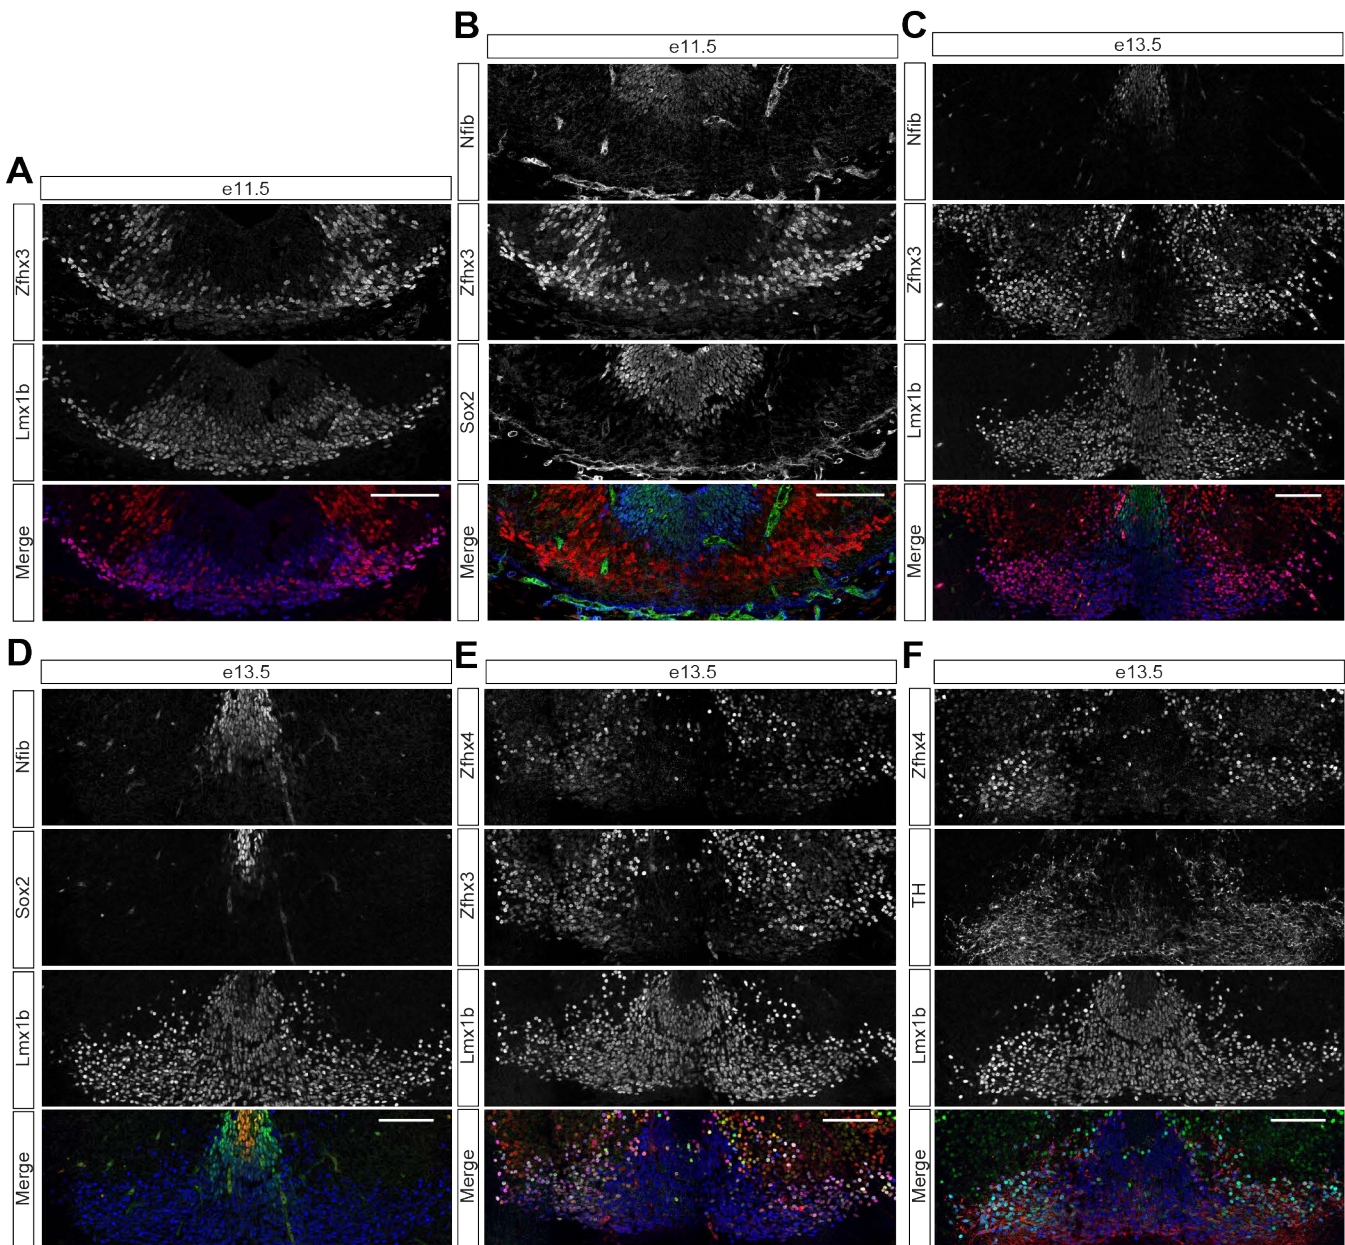

# Figure 4 Sagner et al.

**A**
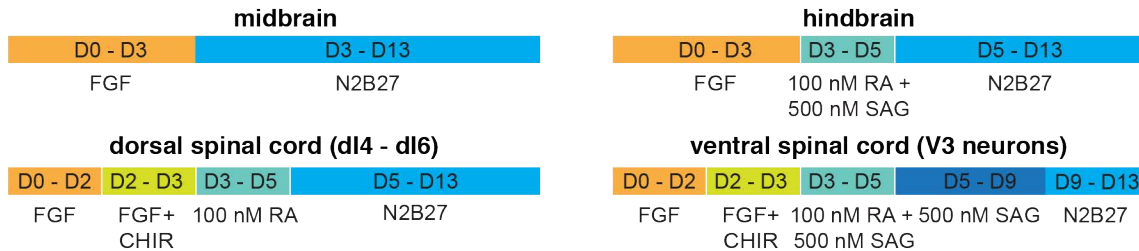
**B**
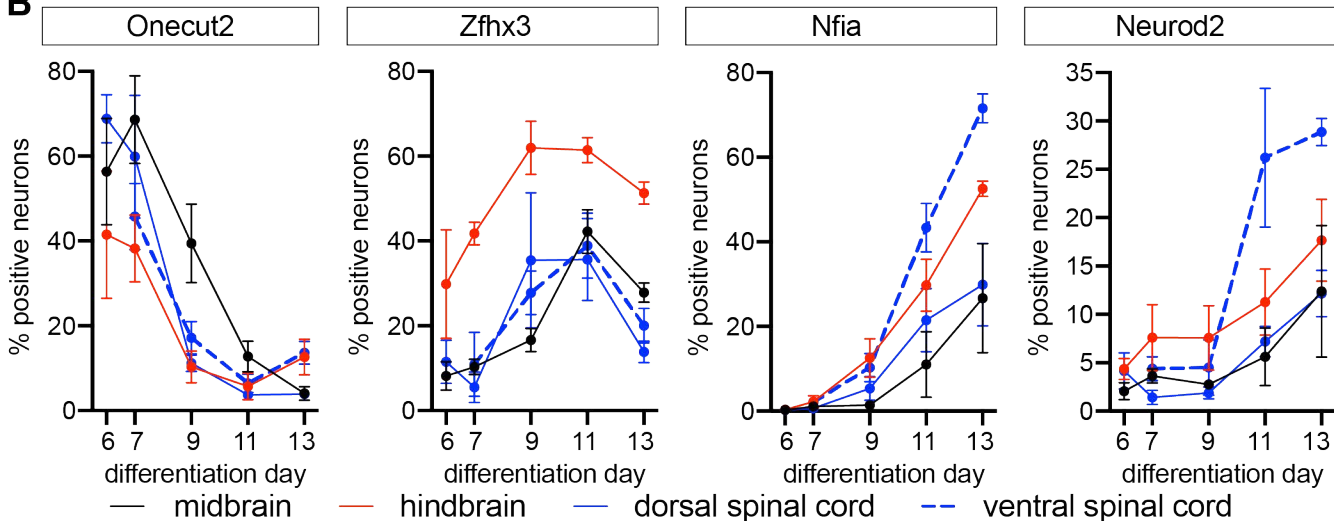
**C**
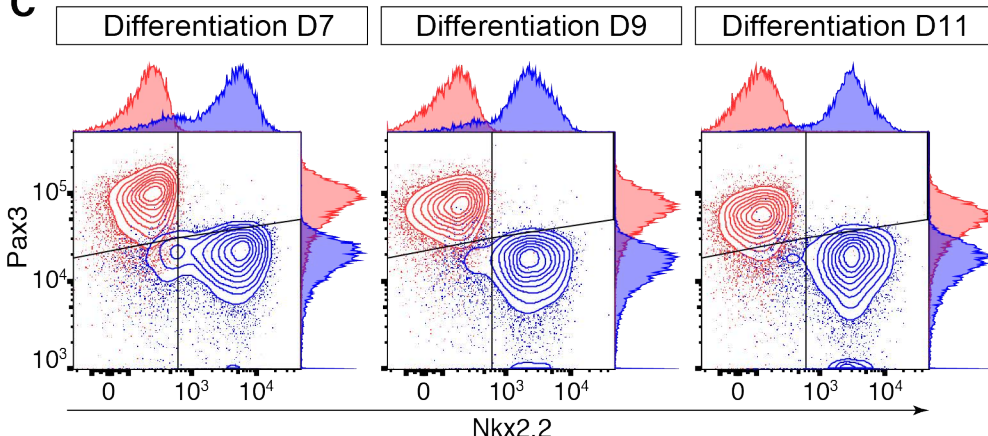
**D**
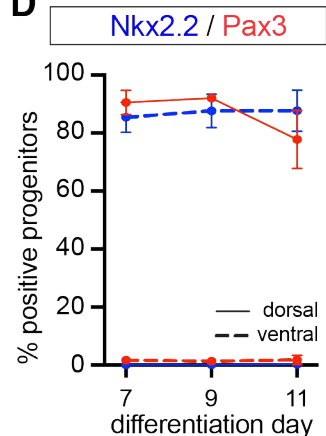



Figure 5 Sagner et al.

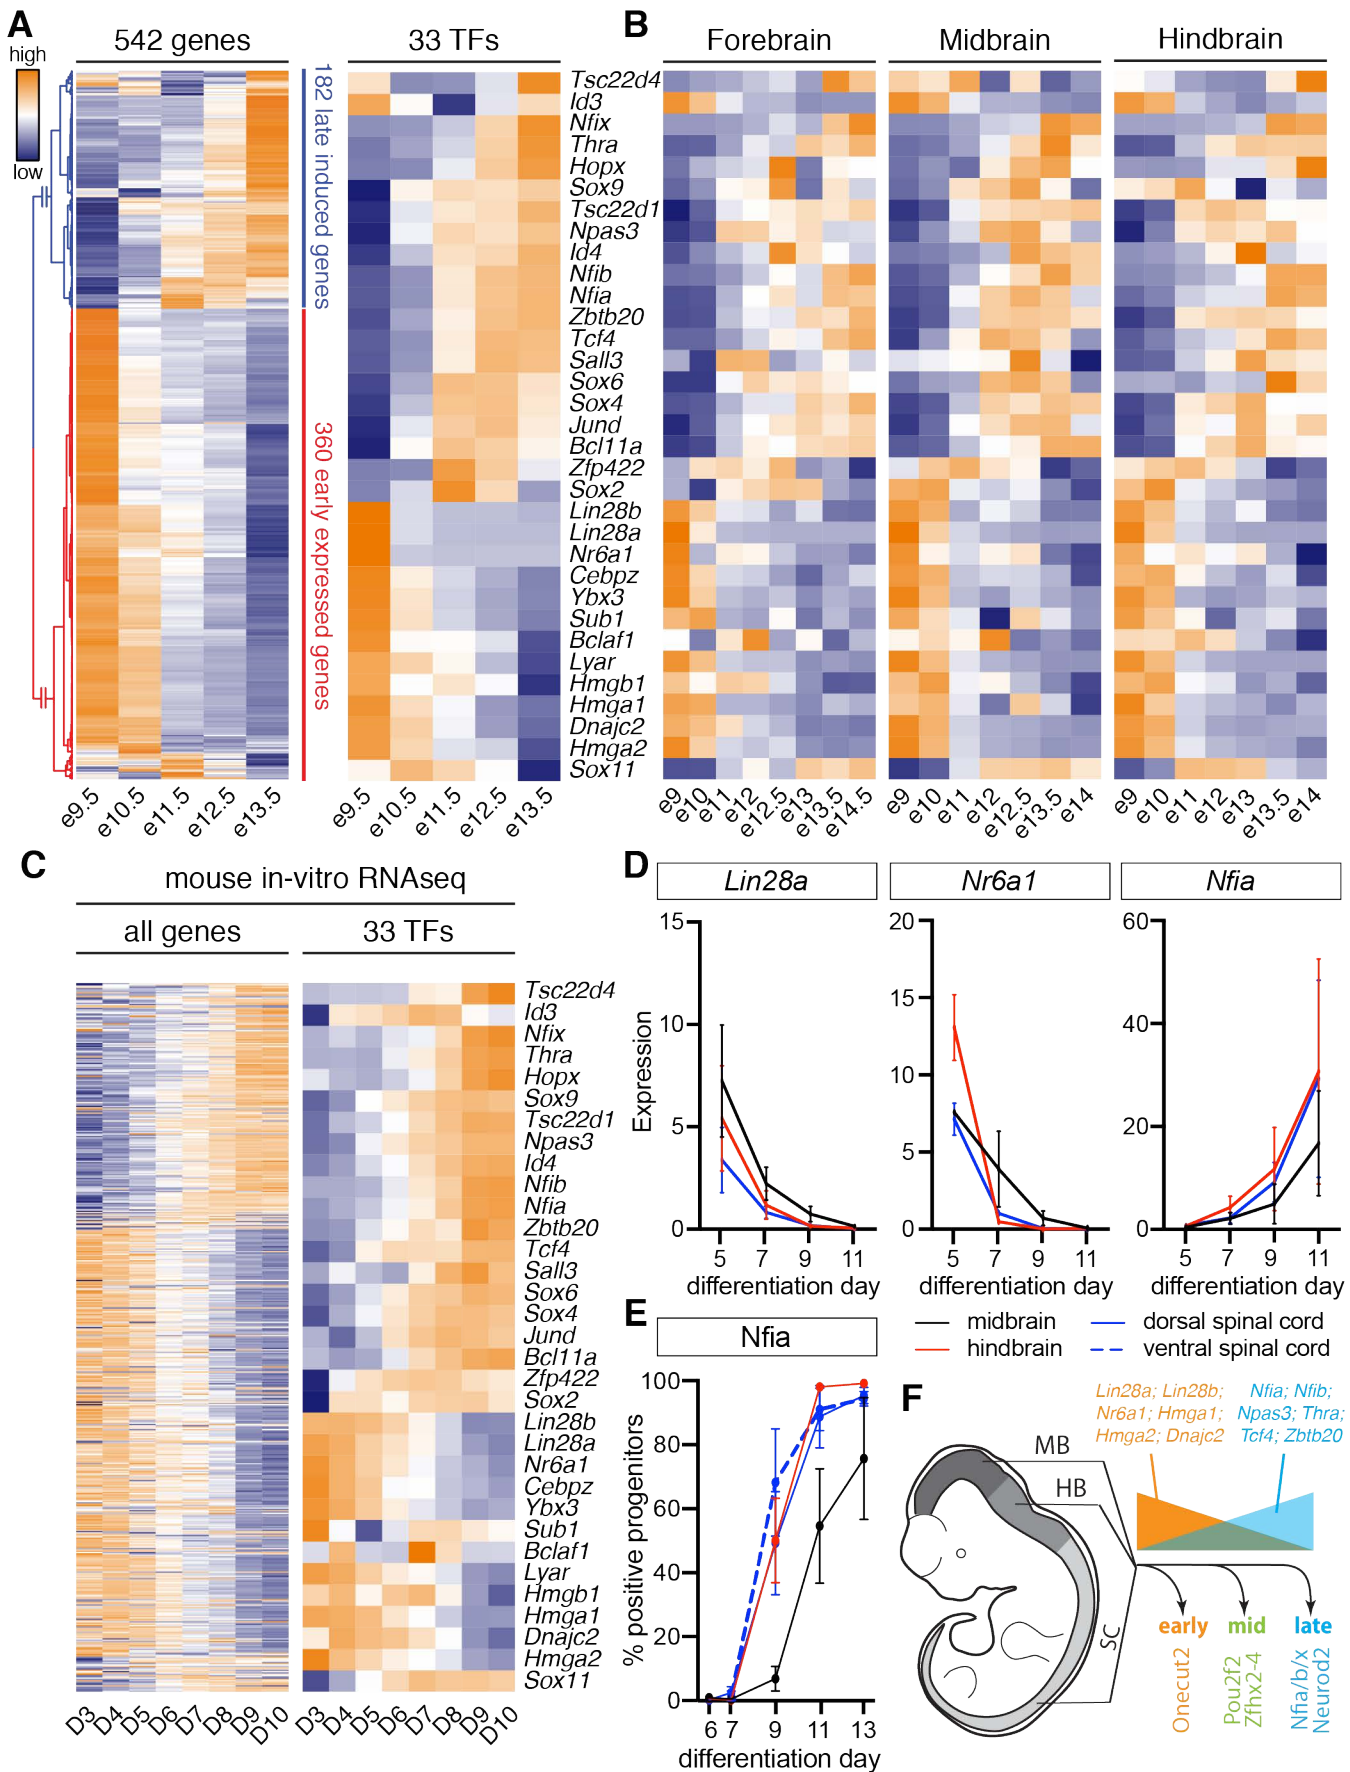

Figure 6 Sagner et al.

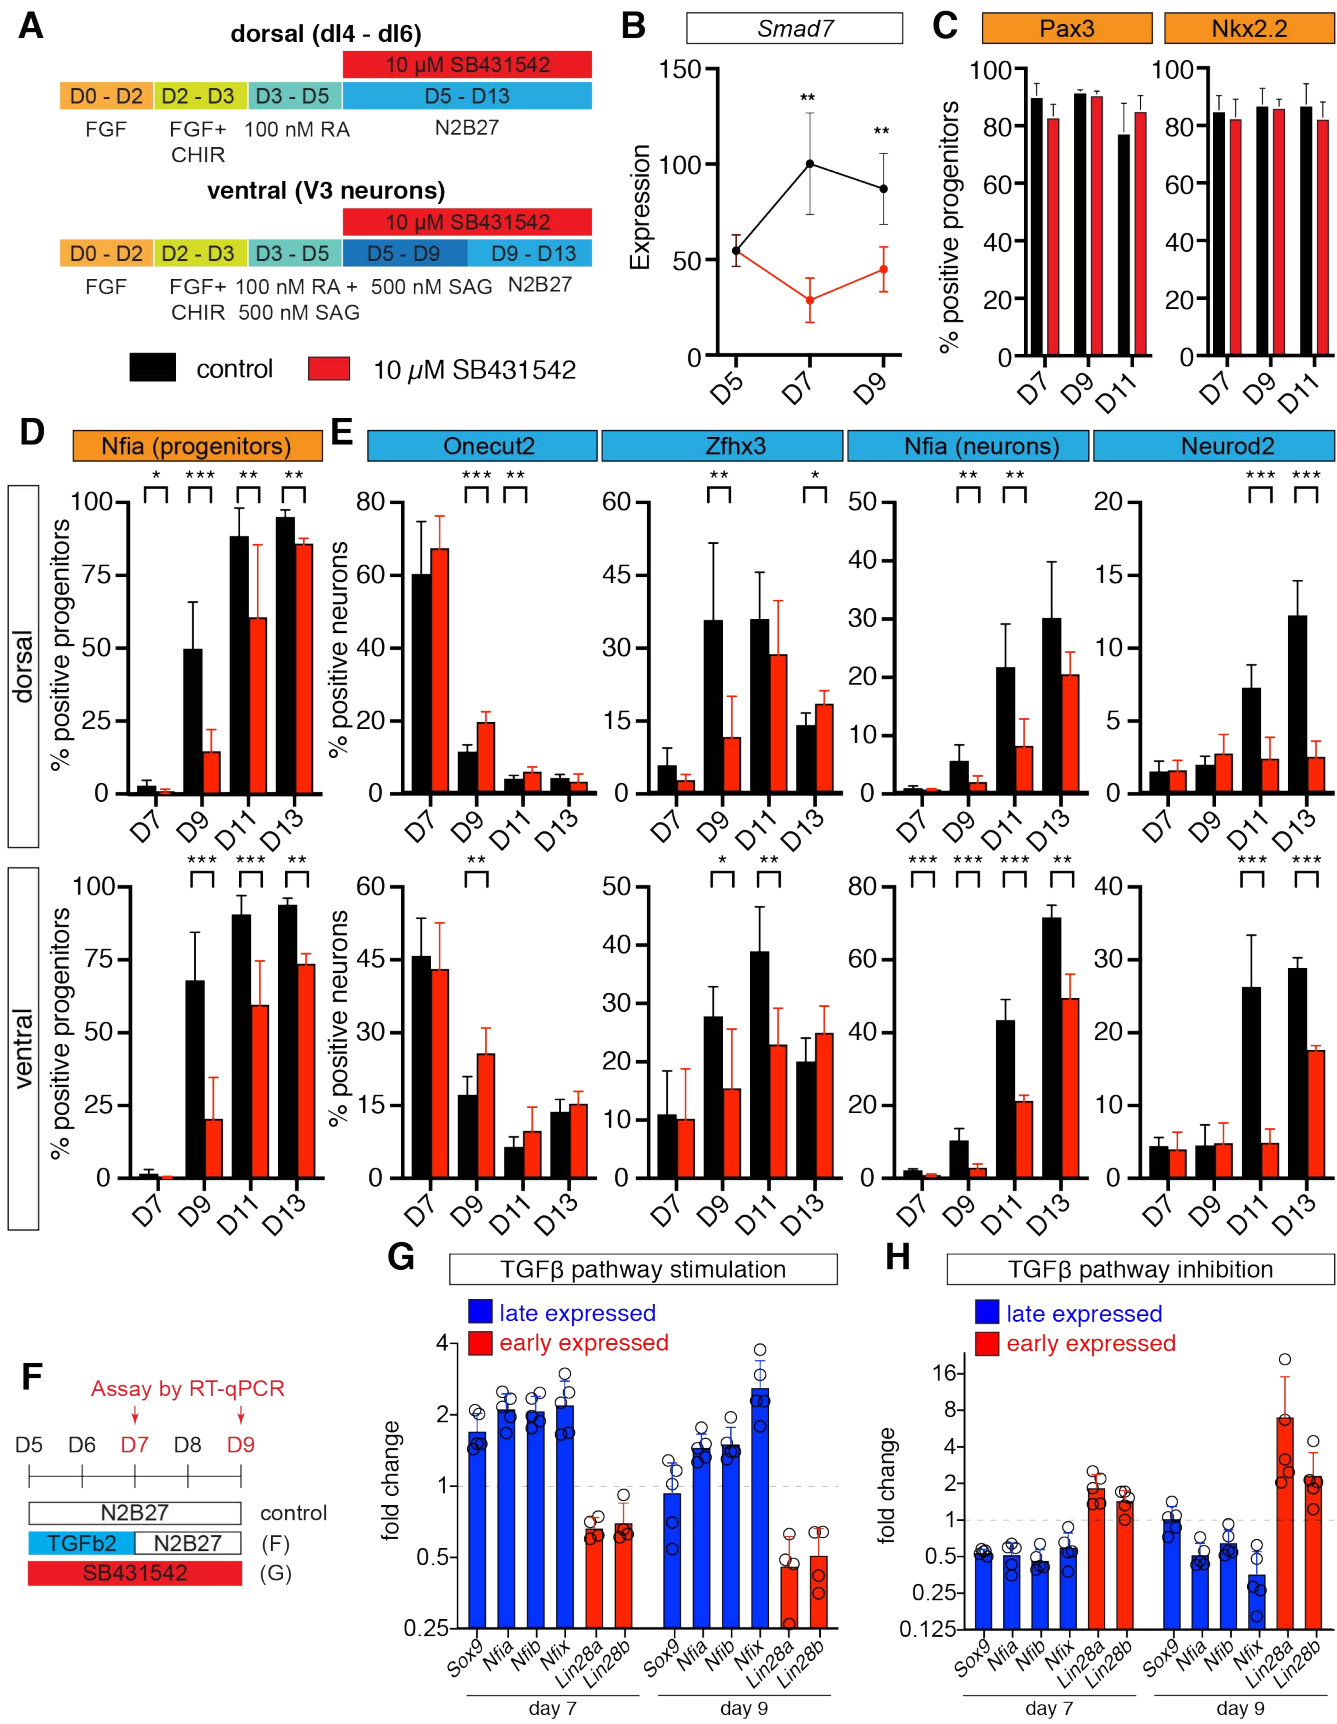

Figure 7 Sagner et al.

**A**

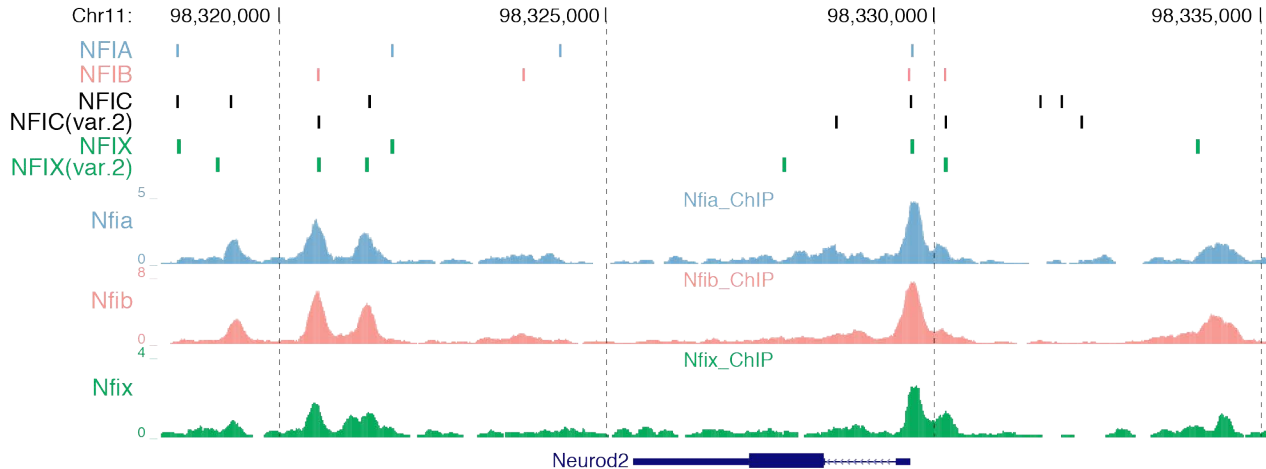

**B**

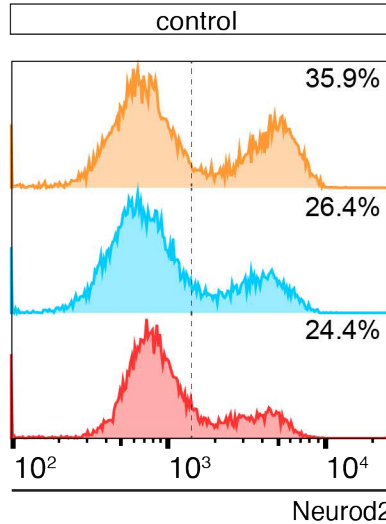

**C**

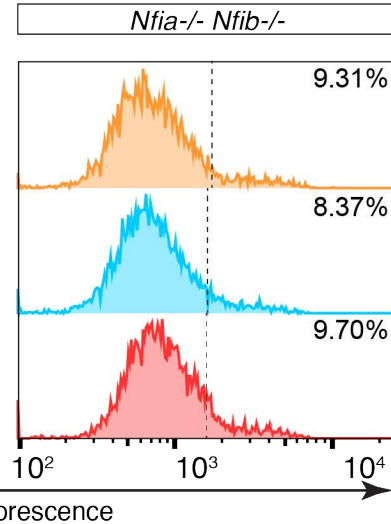

**D**

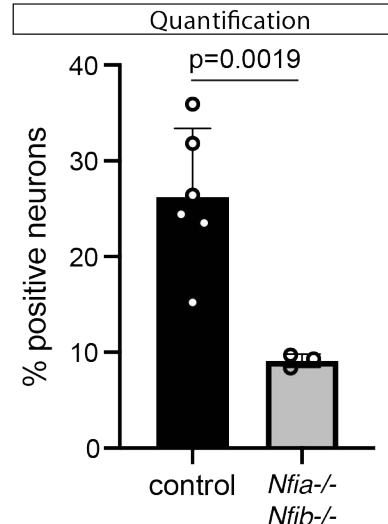



Figure S1 Sagner et al.

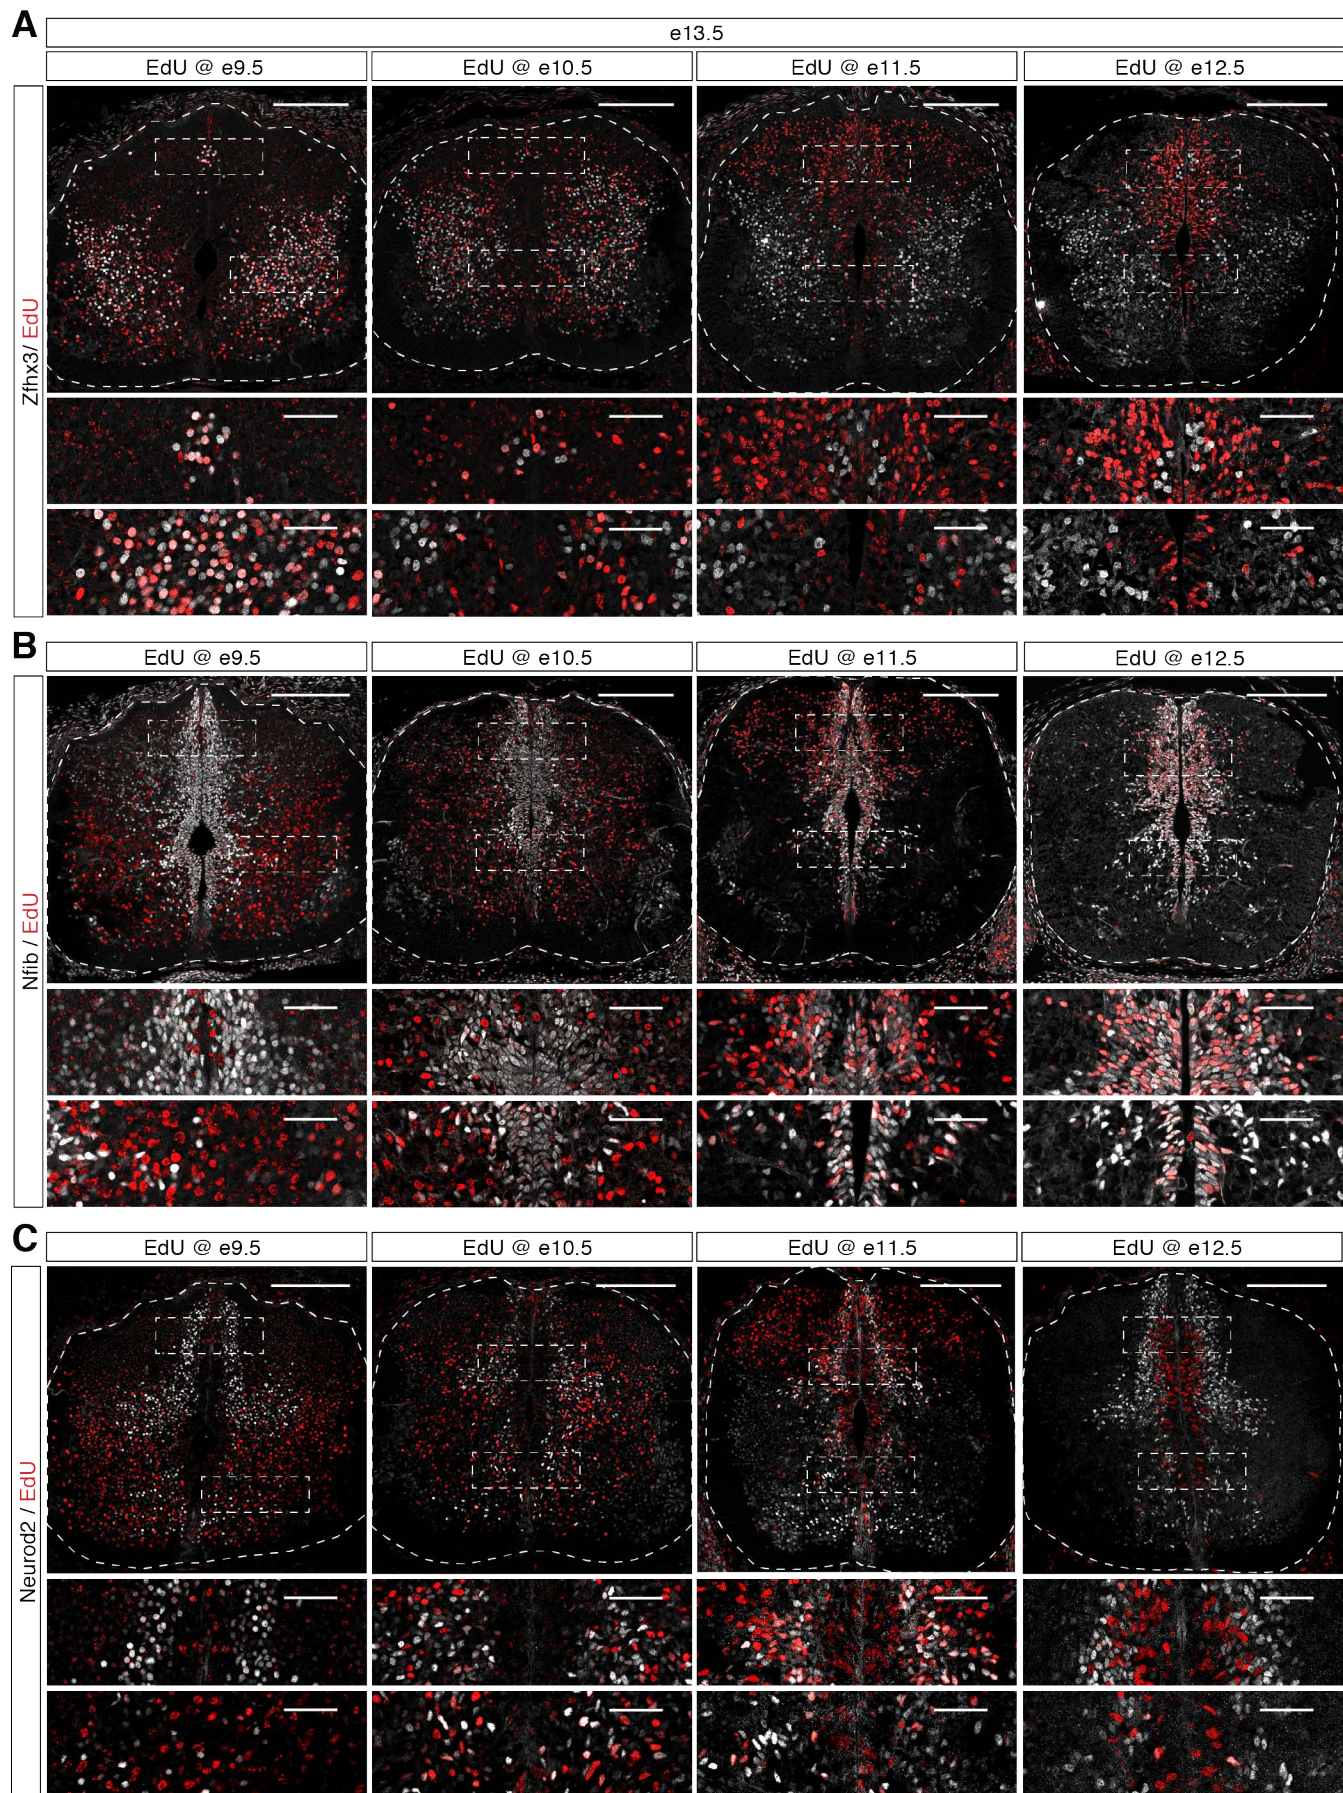



# Figure S2 Sagner et al.

**A**
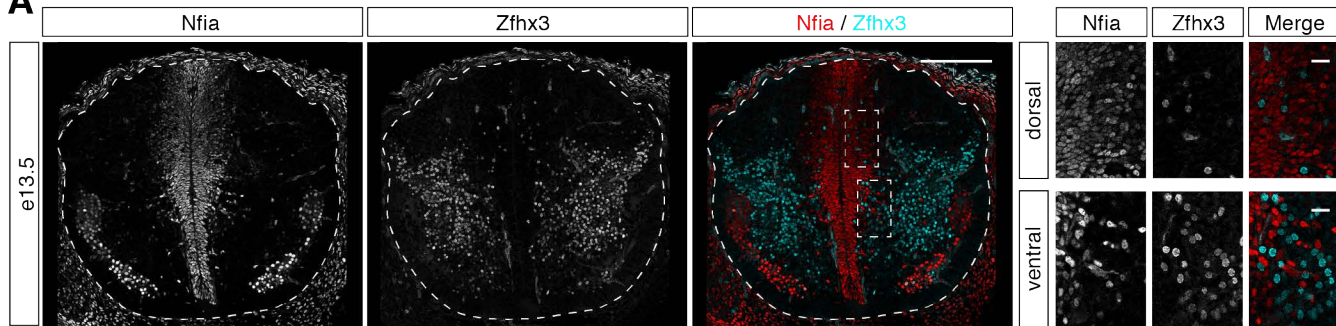
**B**
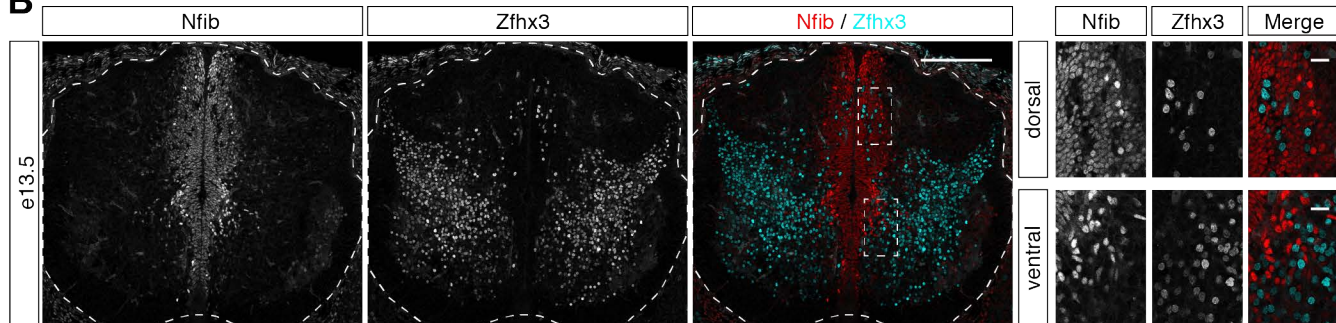
**C**
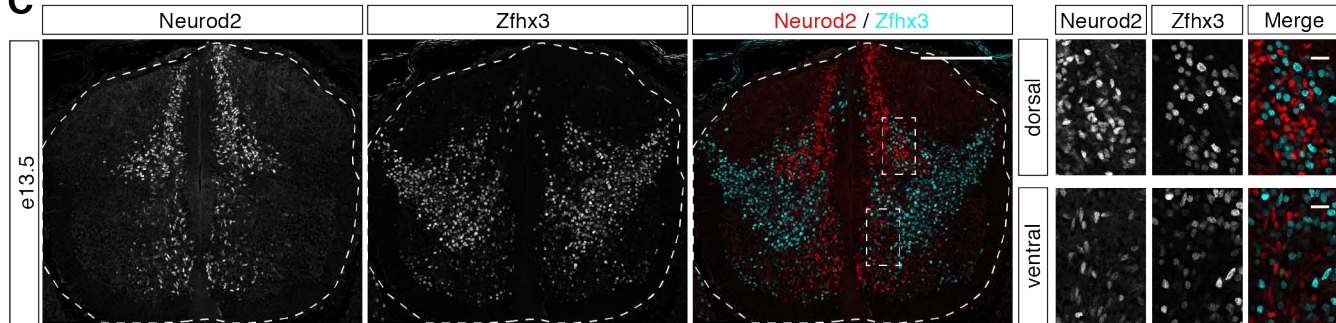

Figure S3 Sagner et al.

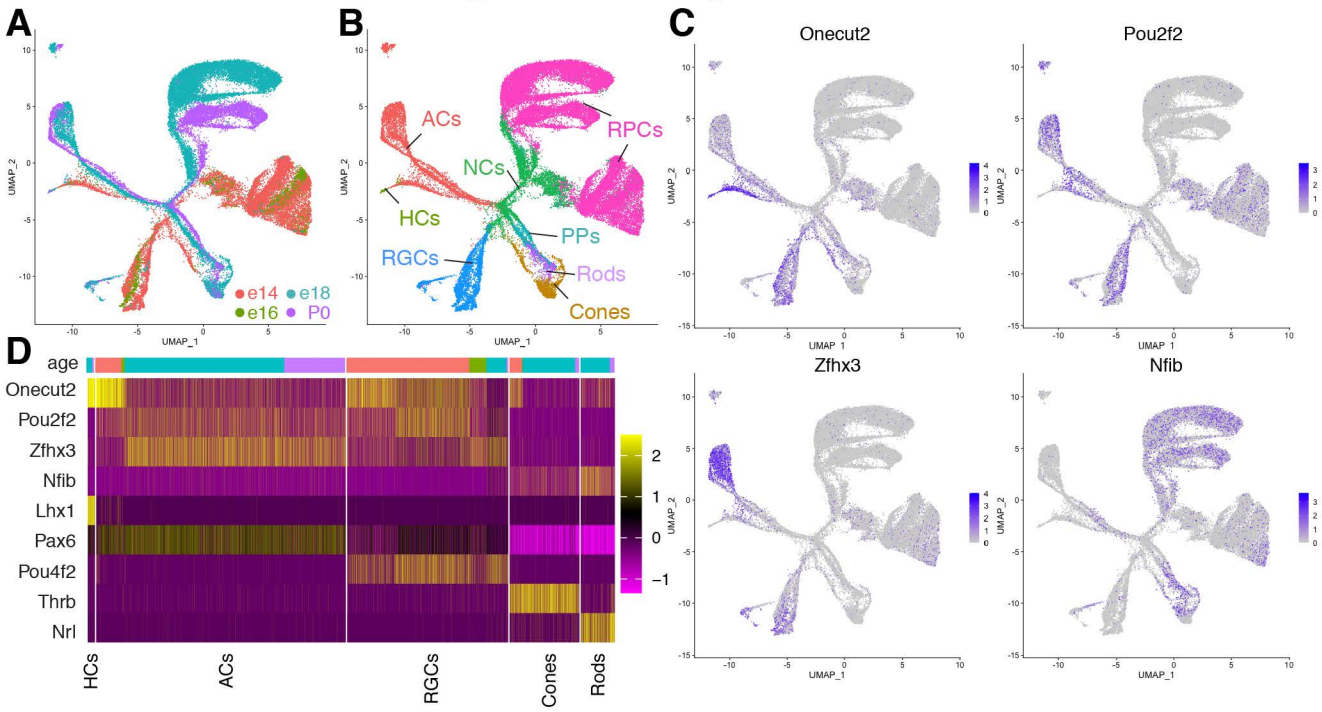



Figure S4 Sagner et al.

**A**

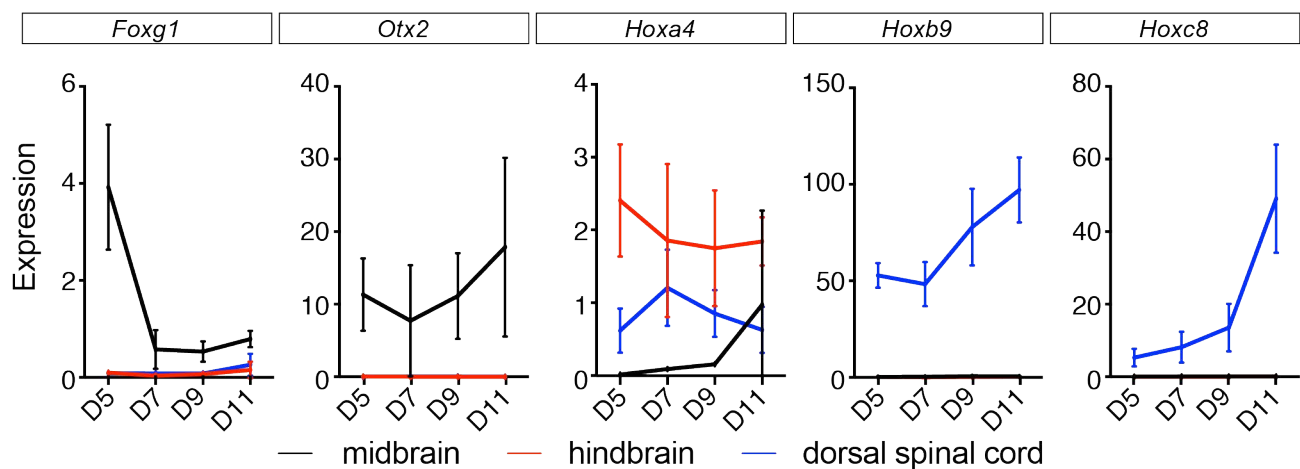

**B**

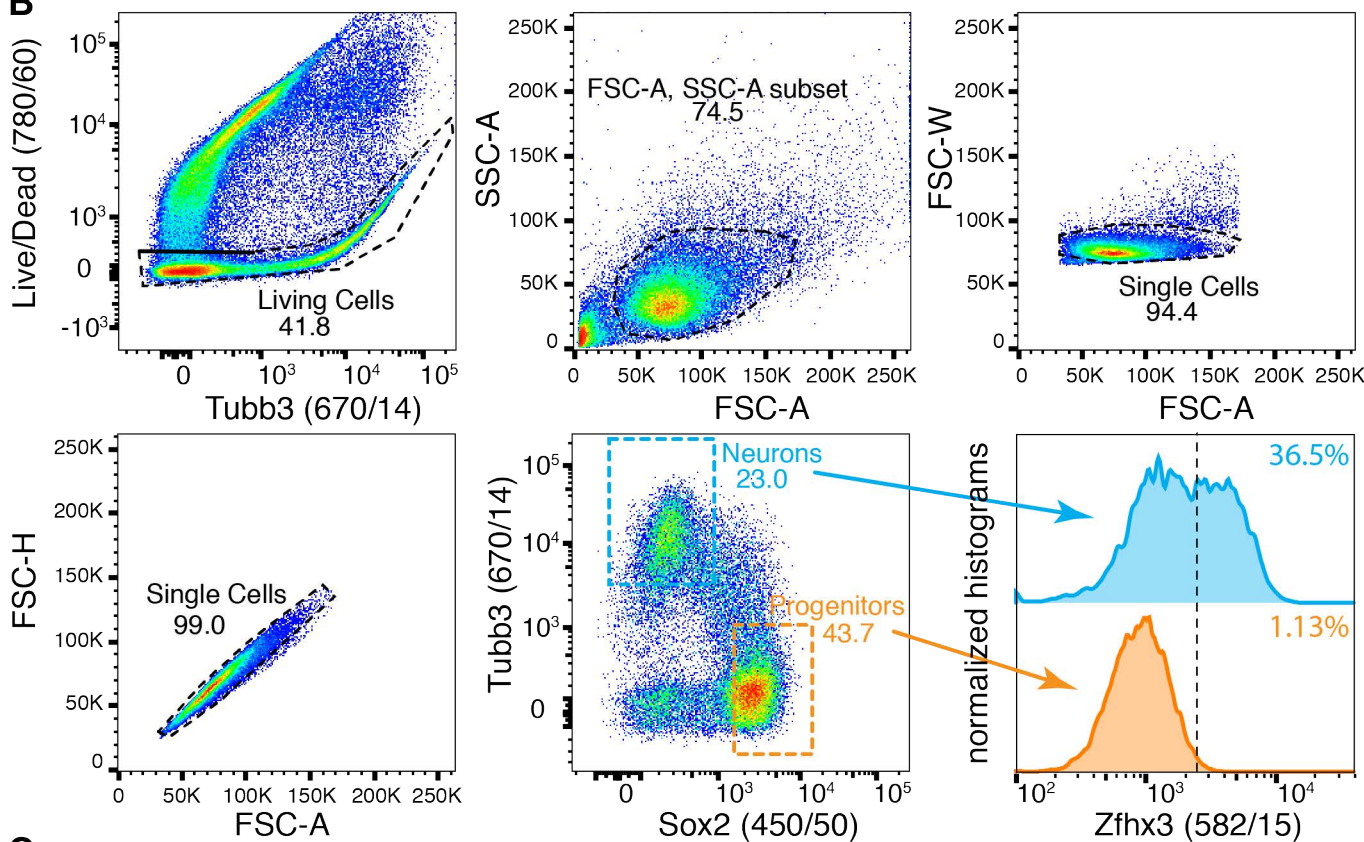

**C**

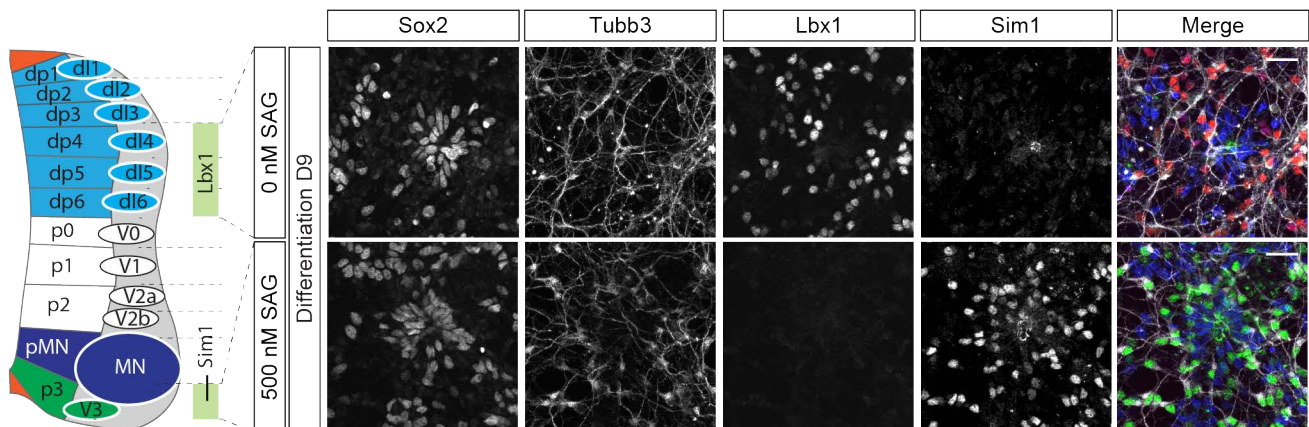

Figure S5 Sagner et al.

**A**

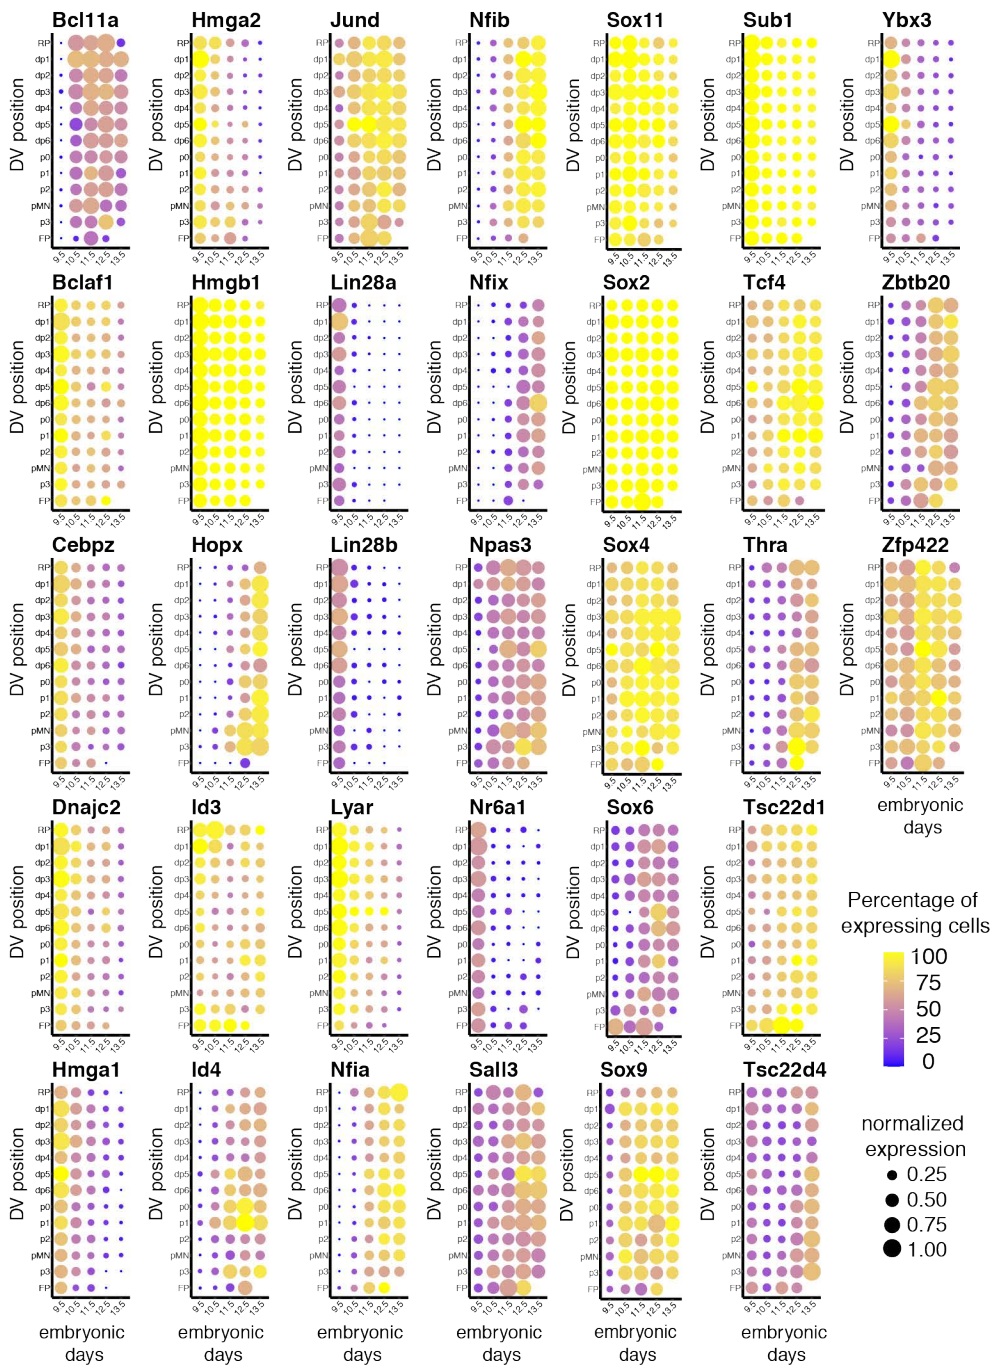

**B**

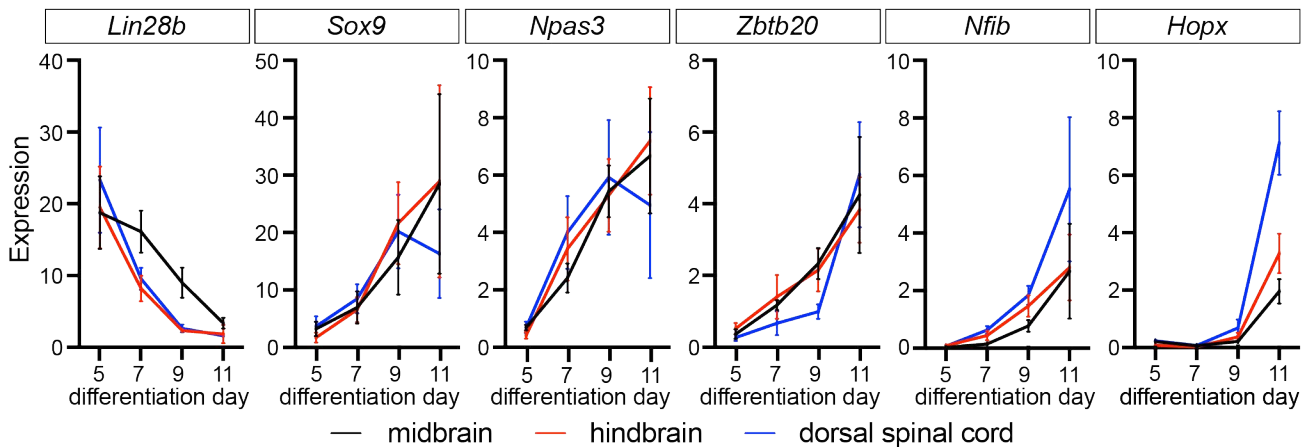

# Figure S6 Sagner et al.

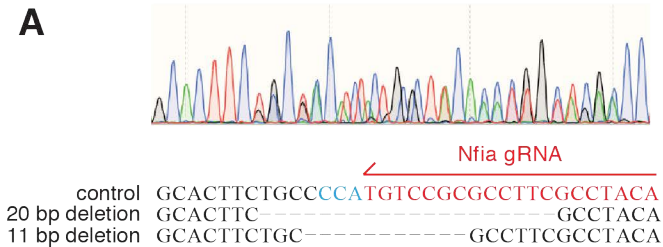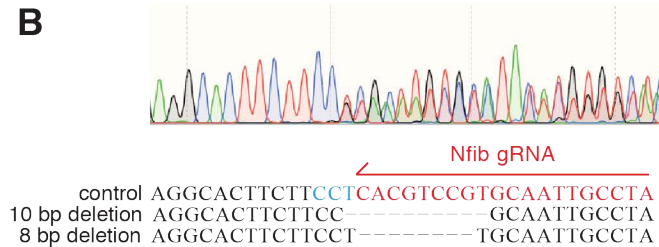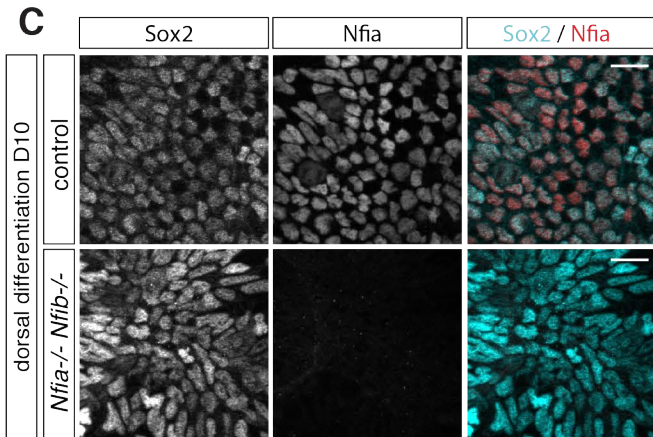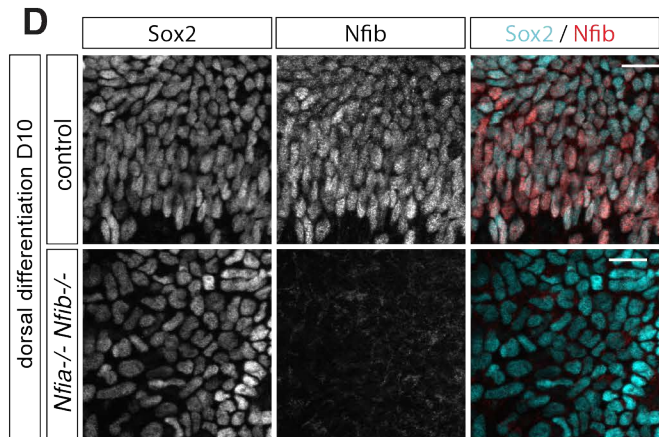

Source: http://biorxiv.org/content/10.1101/2020.11.10.376491v1.full.pdf
